# Supplementary material for: Repurposed Drugs That Block the Gonococcus-Complement Receptor 3 Interaction Can Prevent and Cure Gonococcal Infection of Primary Human Cervical Epithelial Cells
Source: PubMed Central journal article supplement (PMC7064771; doi:10.1128/mbio.03046-19), 2020-03-03

a) **Pilin with Human ri-domain**

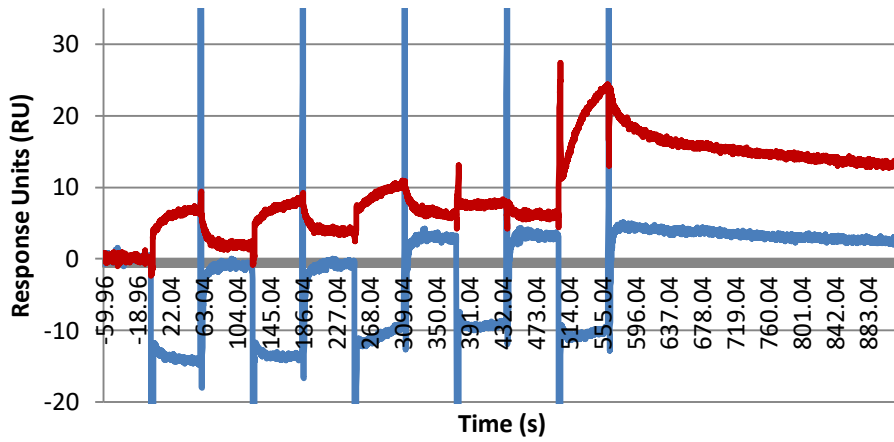

b) **Pilin with rCR3**

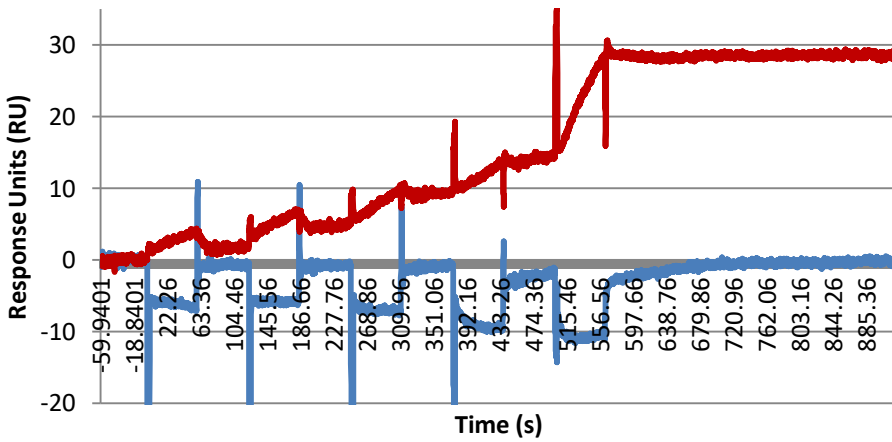

c) **Pilin with Mouse ri-domain**

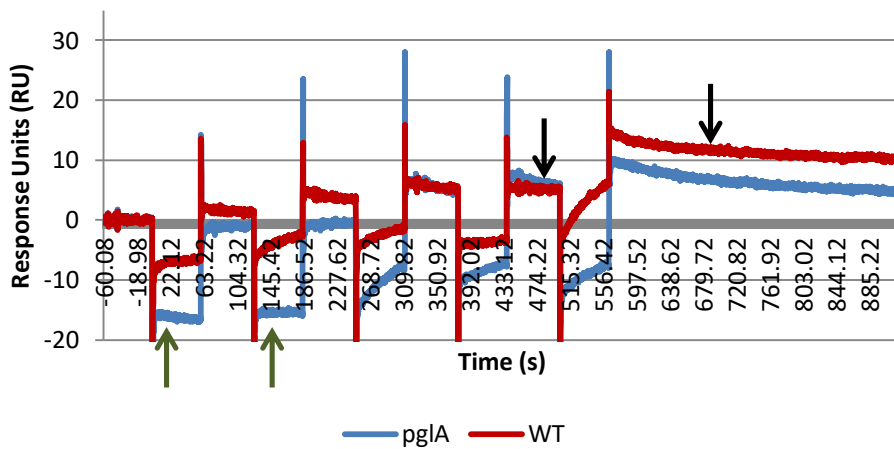

d)

### $\alpha$ 1-3, $\beta$ 1-4, $\alpha$ 1-3 Galactotetraose with rl-domain

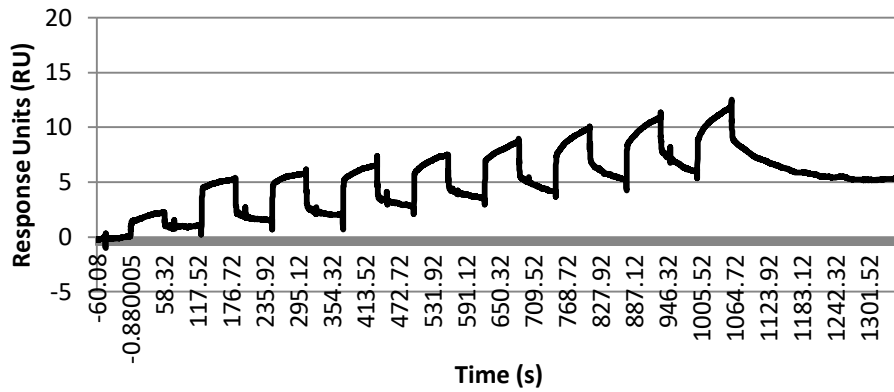

e)

### Linear $\beta$ -2 Trisaccharide with rl-domain

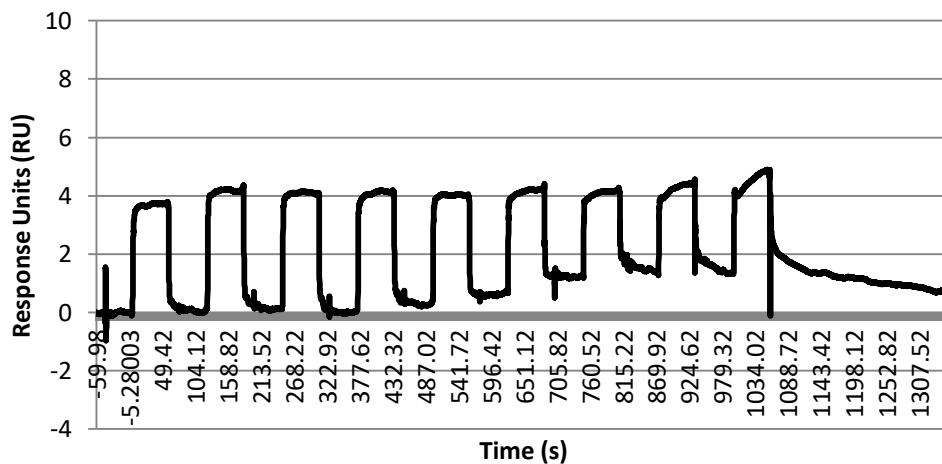

f)

### P1 Antigen with rl-domain

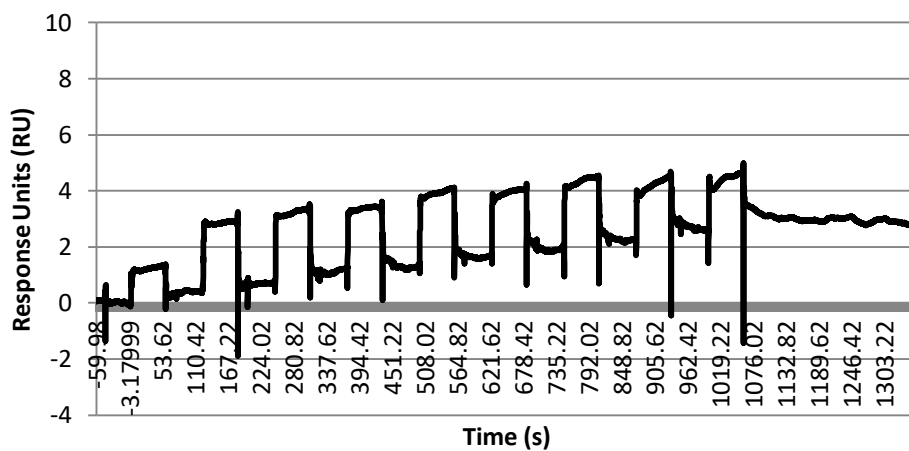

g)

 **$\alpha$ 1-3 Galactobiose with ri-domain**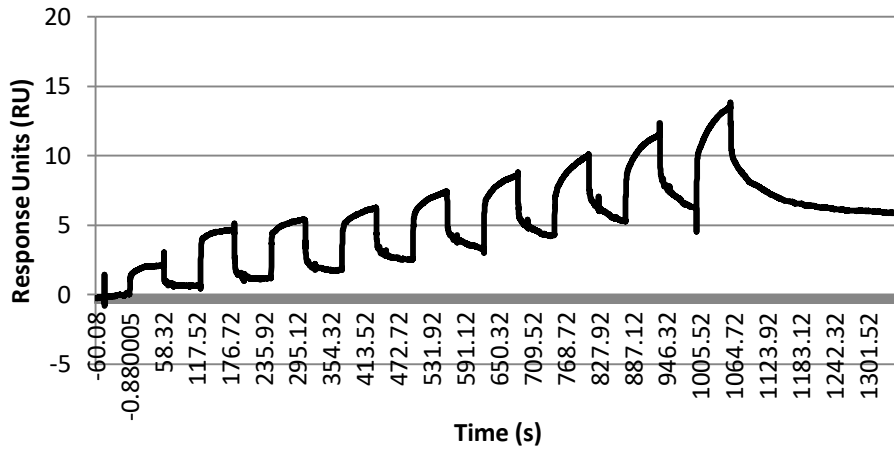

h)

**Lactose with ri-domain**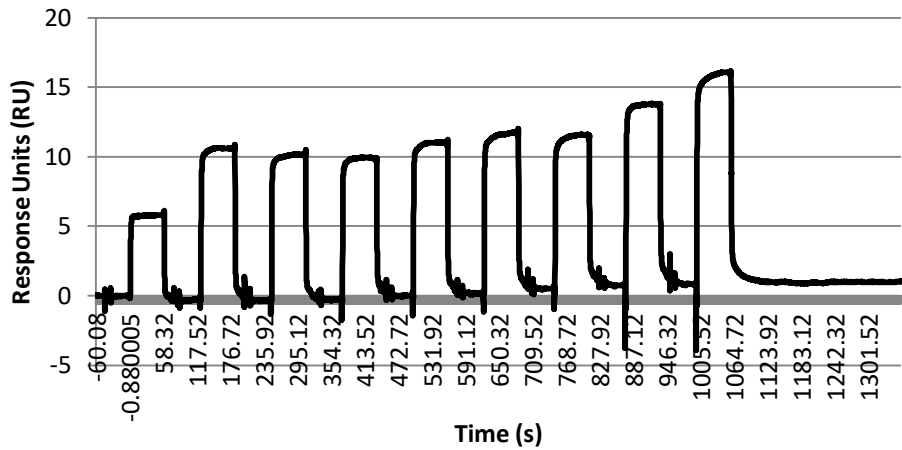

i)

 **$\alpha$ Lactose with ri-domain**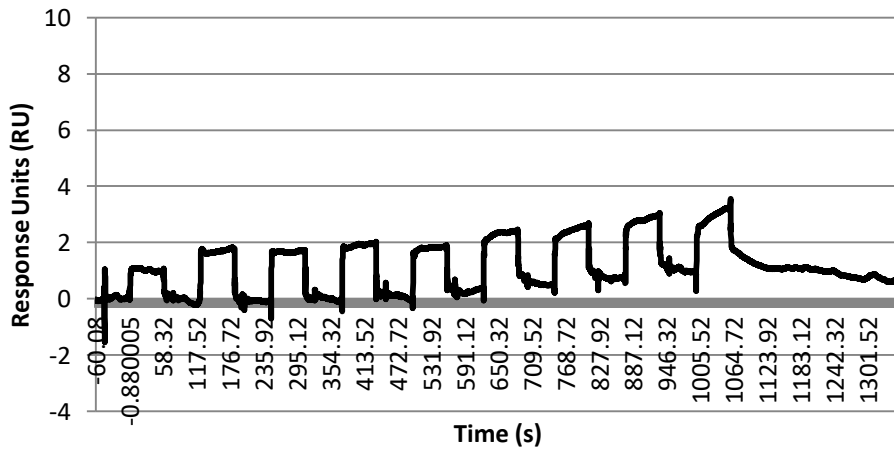

j)

### Methyl- $\alpha$ -D-galactopyranoside with rl-domain

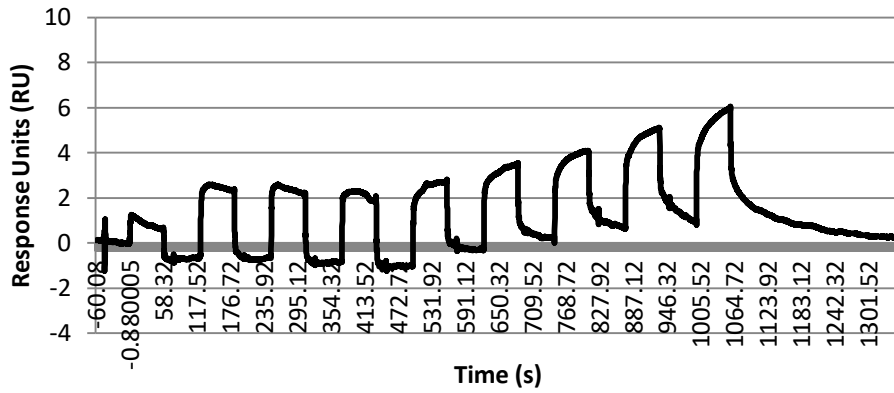

k)

### Sucrose with rl-domain

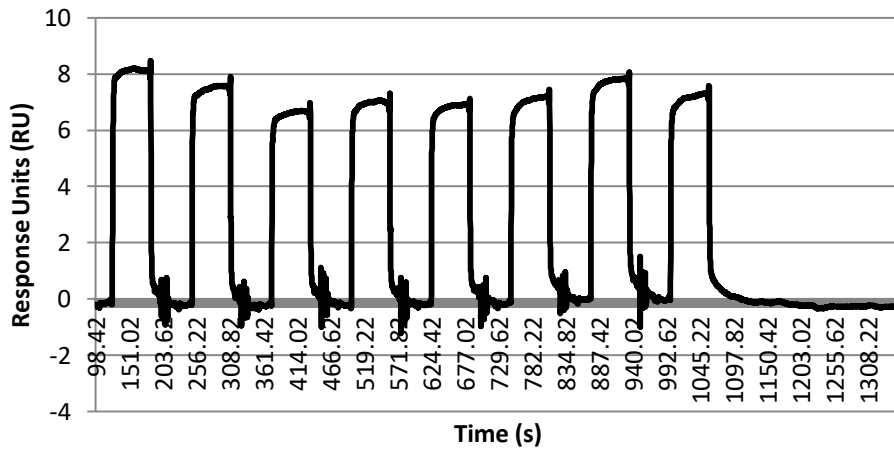

l)

### $\alpha$ 1-3, $\beta$ 1-4, $\alpha$ 1-3 Galactotetraose with rCR3

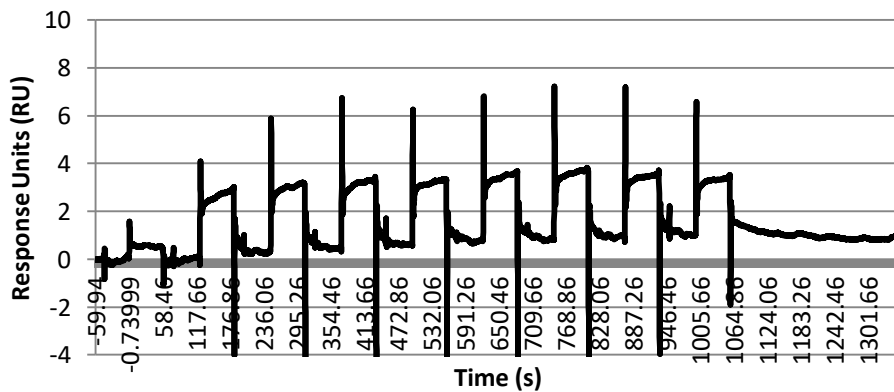

m)

### Linear $\beta$ -2 Trisaccharide with rCR3

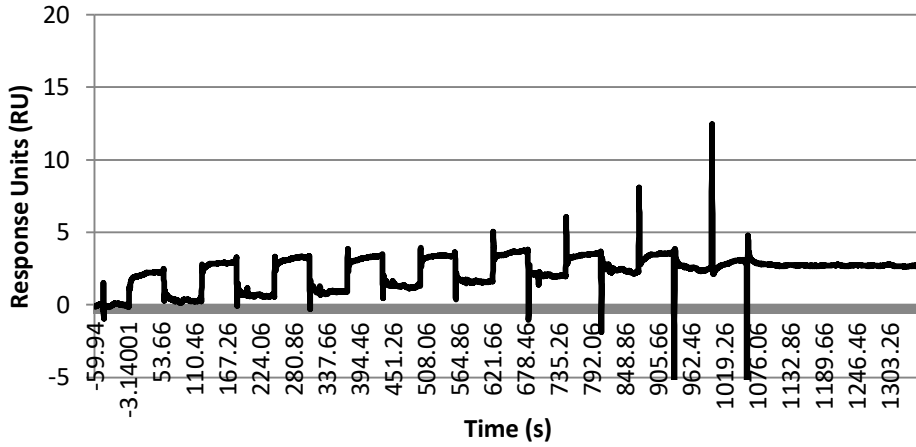

n)

### P1 Antigen with rCR3

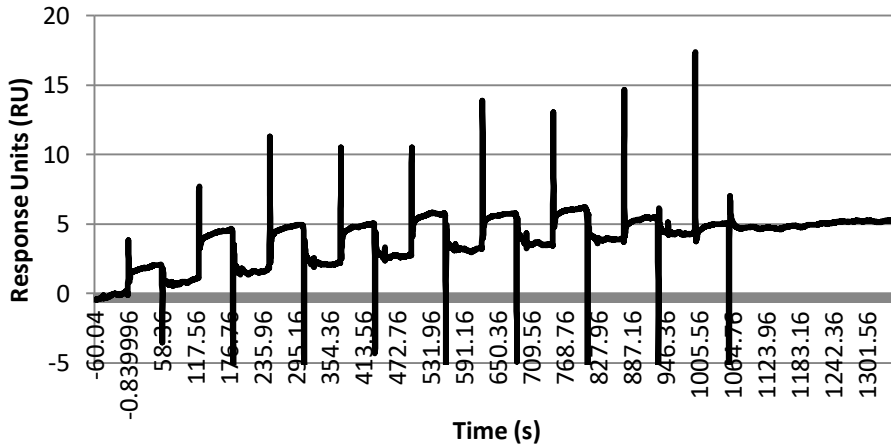

o)

### $\alpha$ 1-3 Galactobiose with rCR3

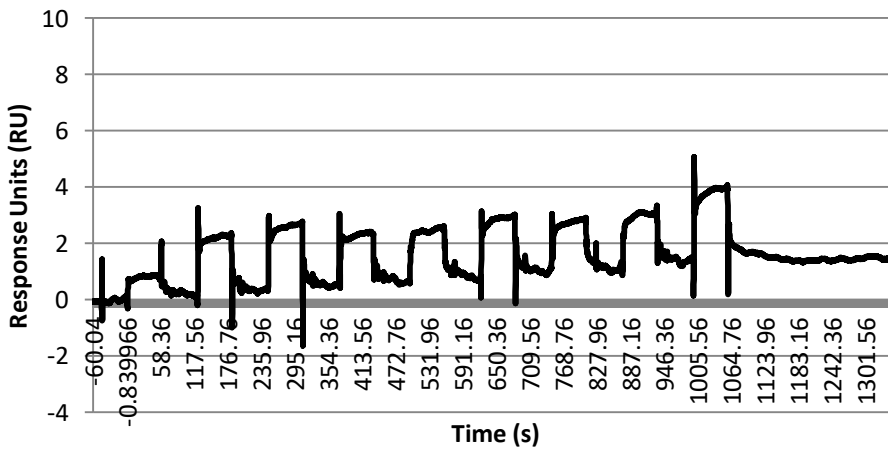

p)

### Lactose with rCR3

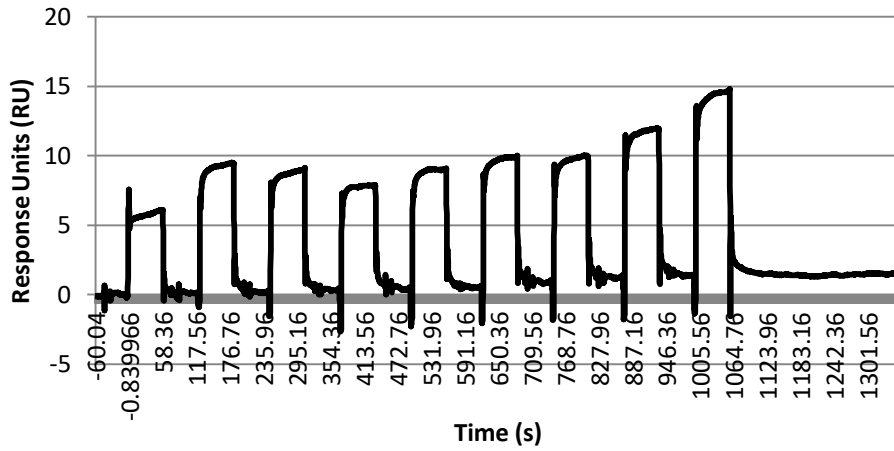

q)

### $\alpha$ Lactose with rCR3

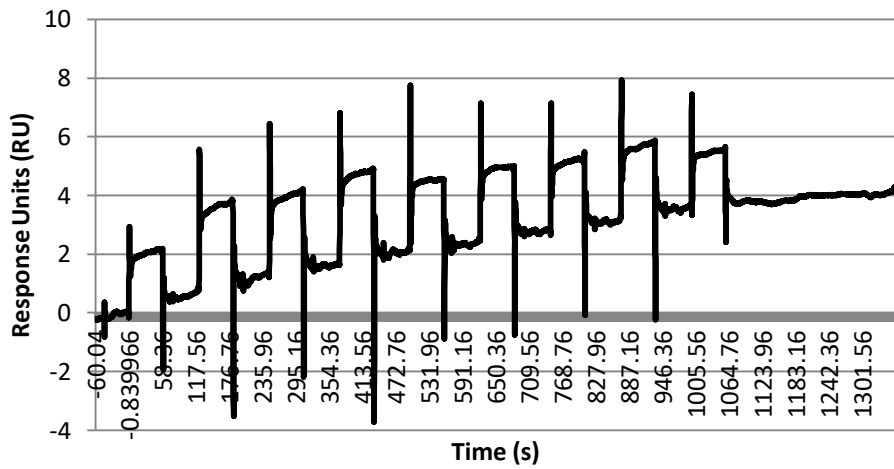

r)

### Methyl- $\alpha$ -D-galactopyranoside with rCR3

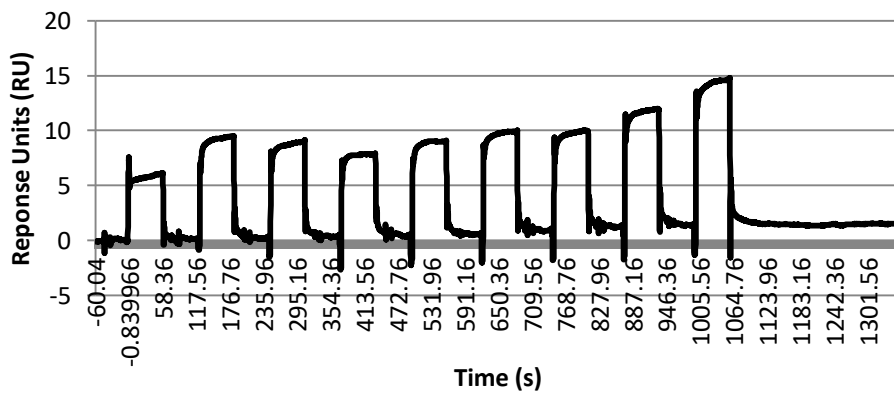

s)

### Sucrose with rCR3

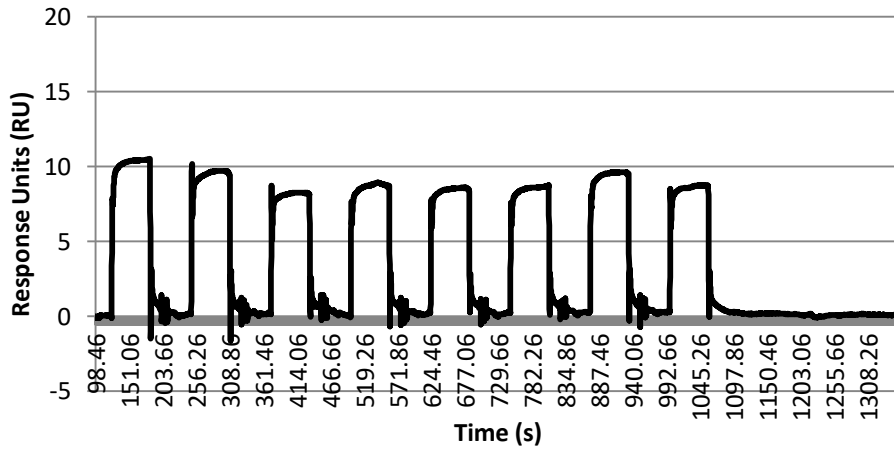

t)

### $\alpha$ 1-3 Galactobiose with G2 Complex

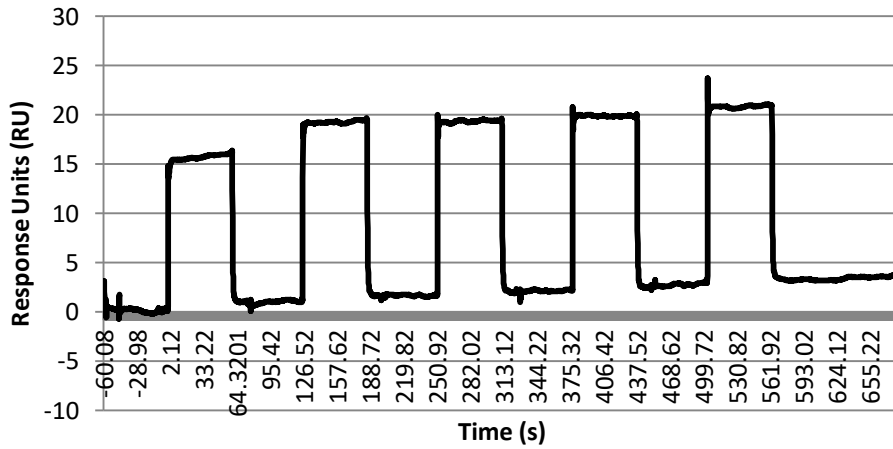

u)

### Methyl- $\alpha$ -D-galactopyranoside with G2 Complex

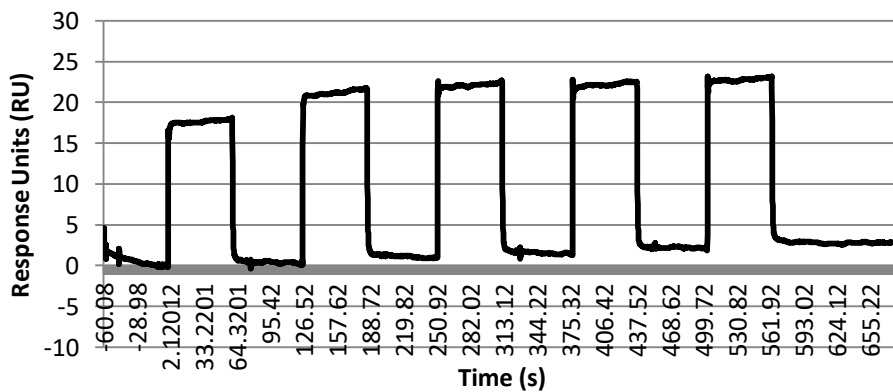

v)

## Sucrose with G2 Complex

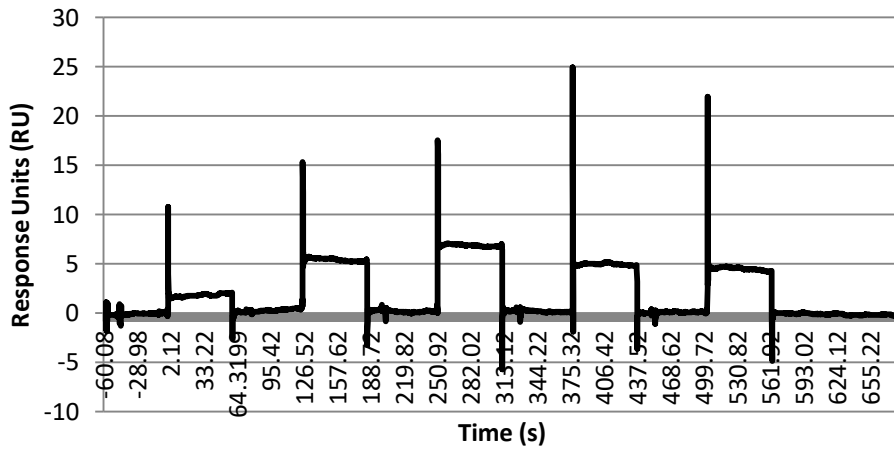

Supplement: mBio.03046-19-sf002.pdf [file mBio.03046-19-sf002.pdf]
