# Supplementary material for: Repurposed Drugs That Block the Gonococcus-Complement Receptor 3 Interaction Can Prevent and Cure Gonococcal Infection of Primary Human Cervical Epithelial Cells
Source: PubMed Central journal article supplement (PMC7064771; doi:10.1128/mbio.03046-19), 2020-03-03

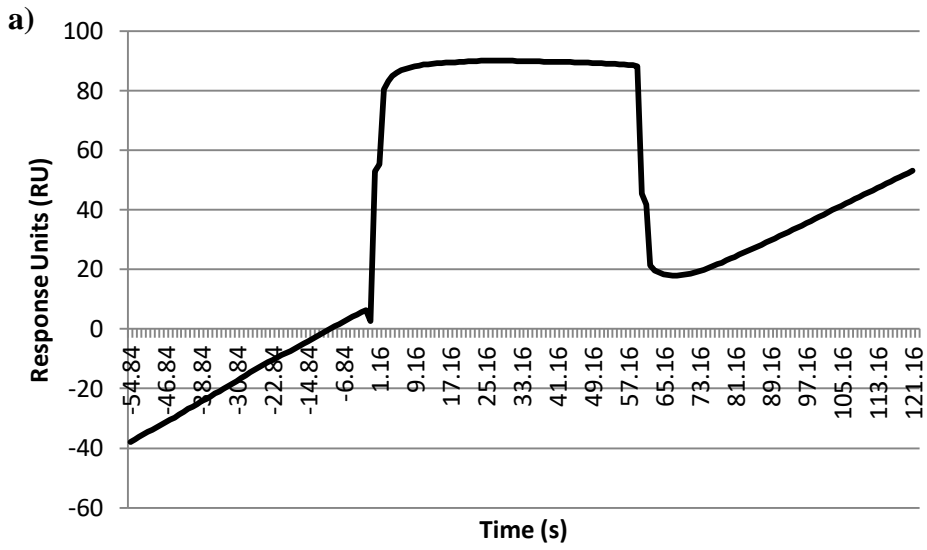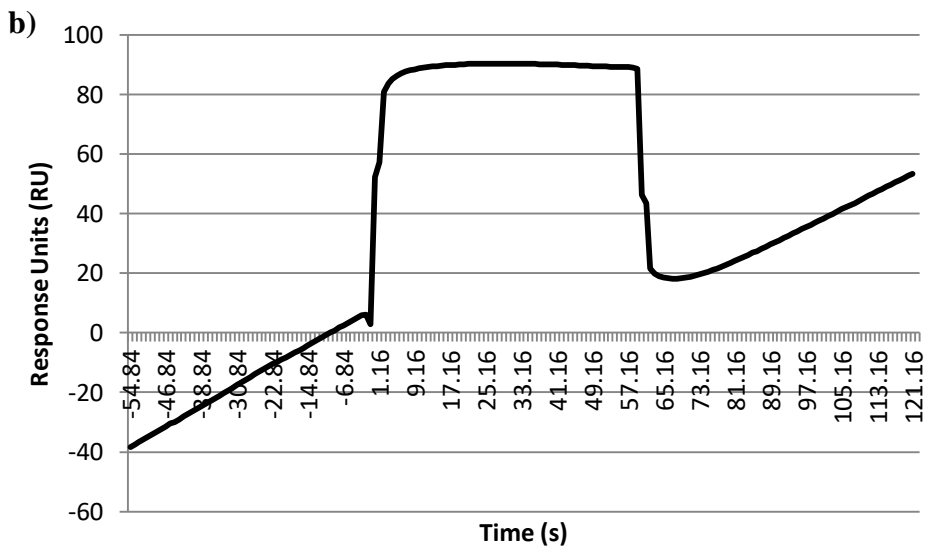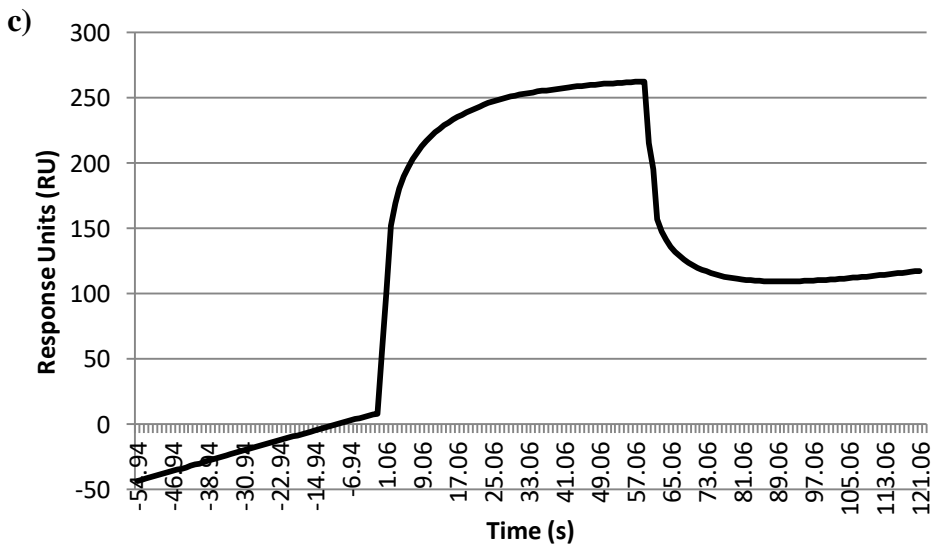

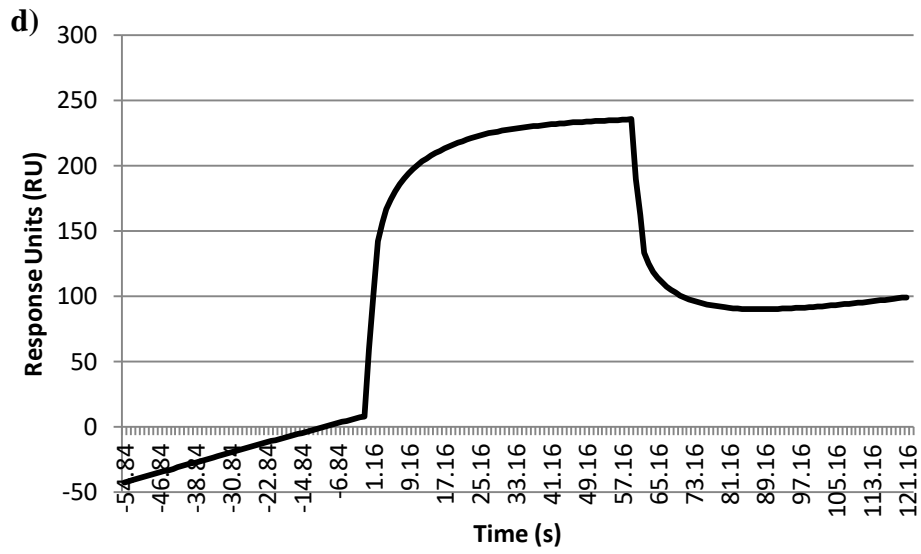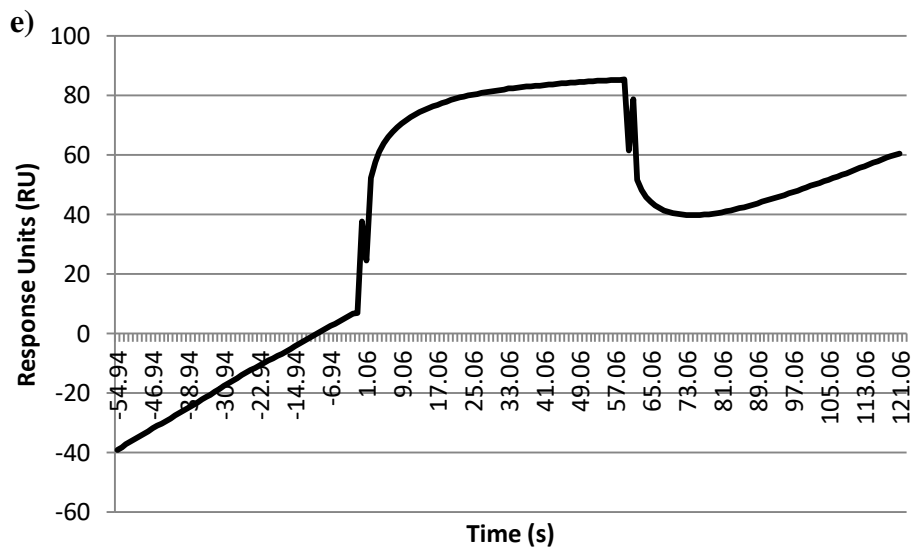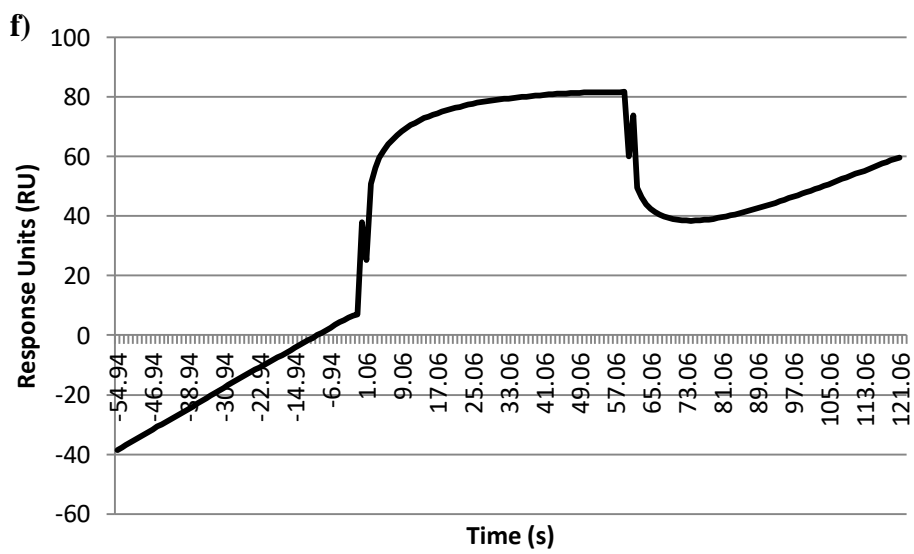

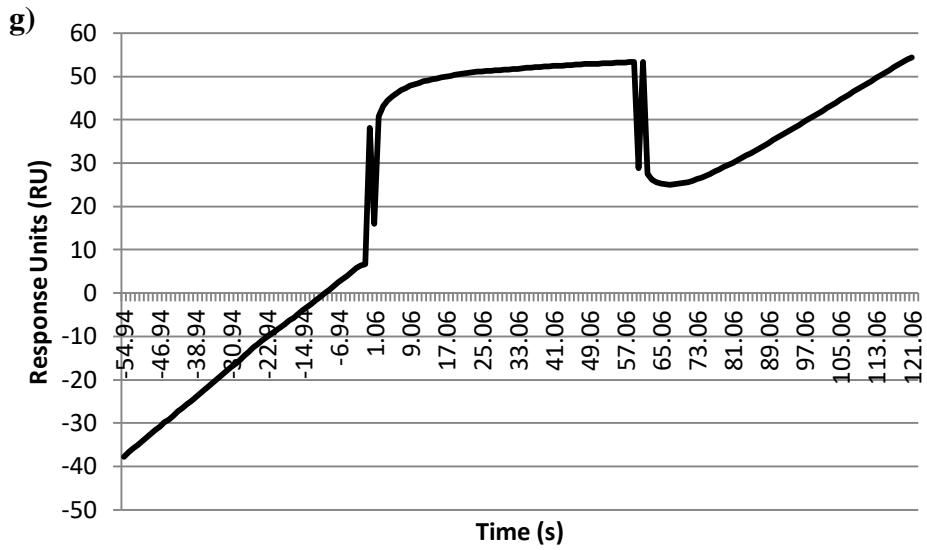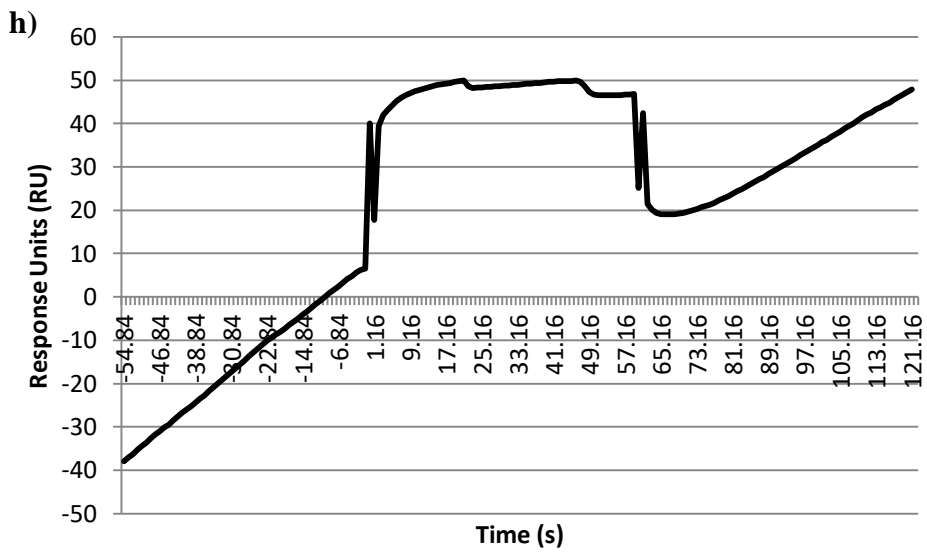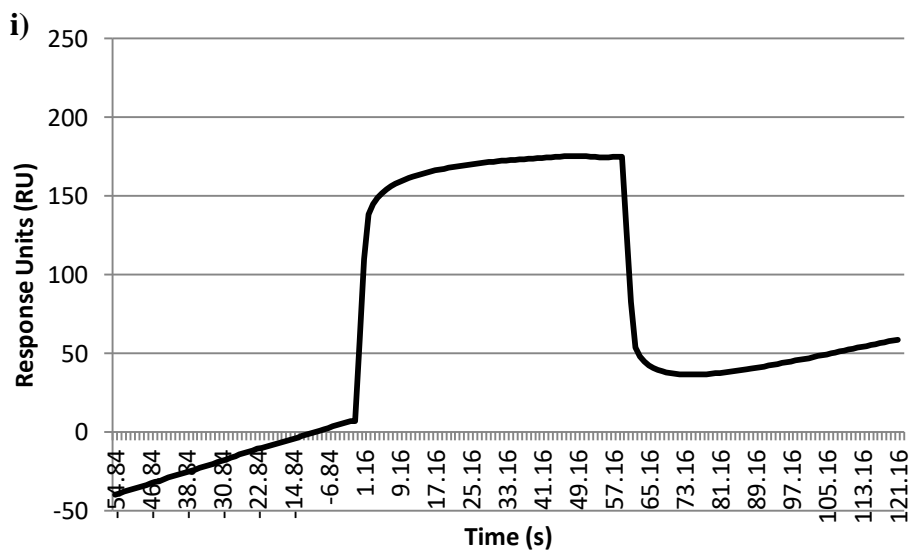

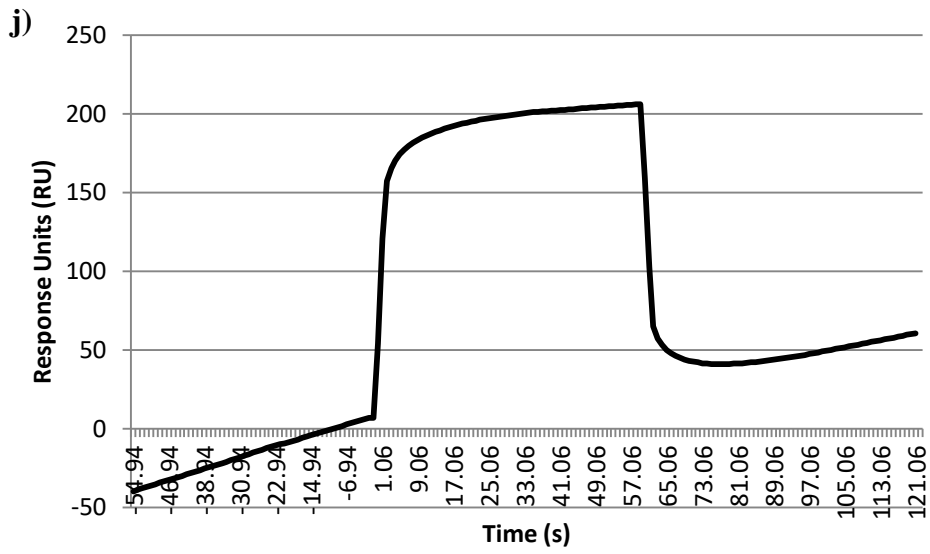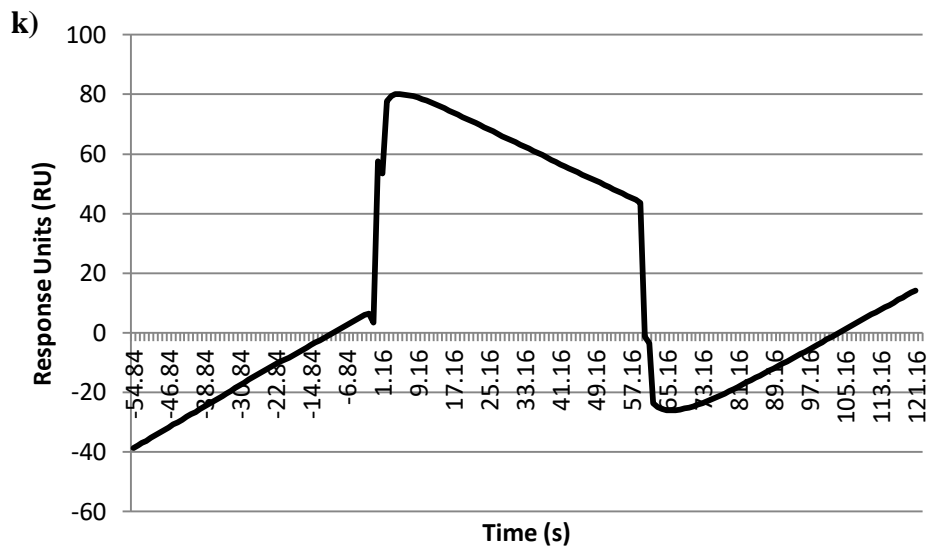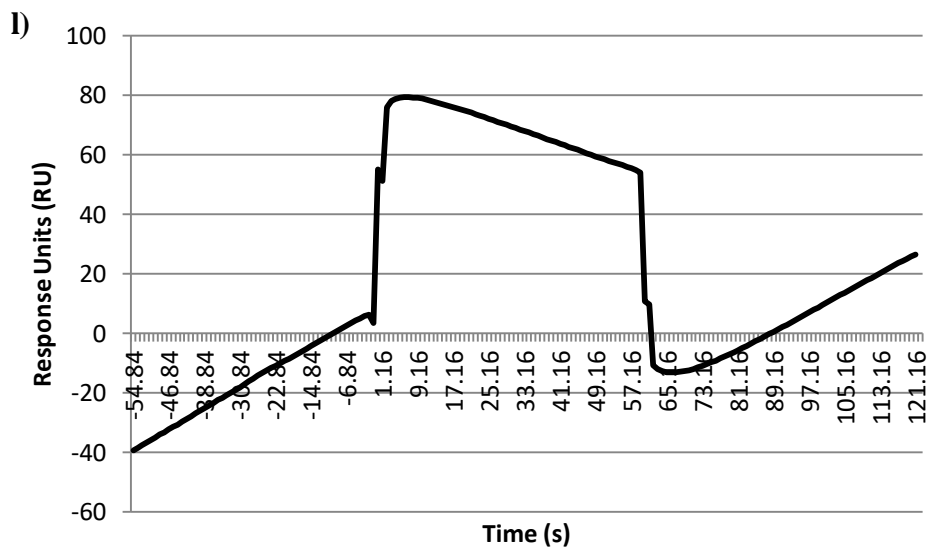

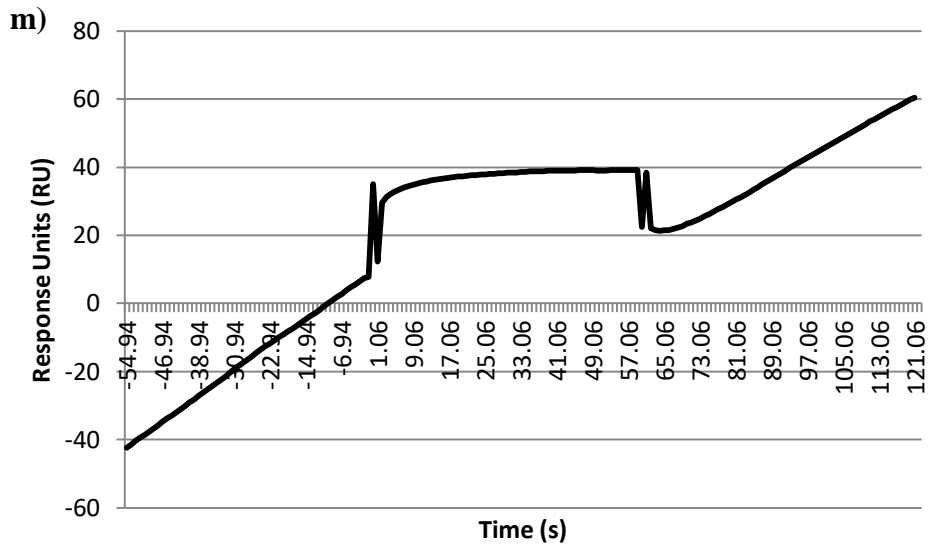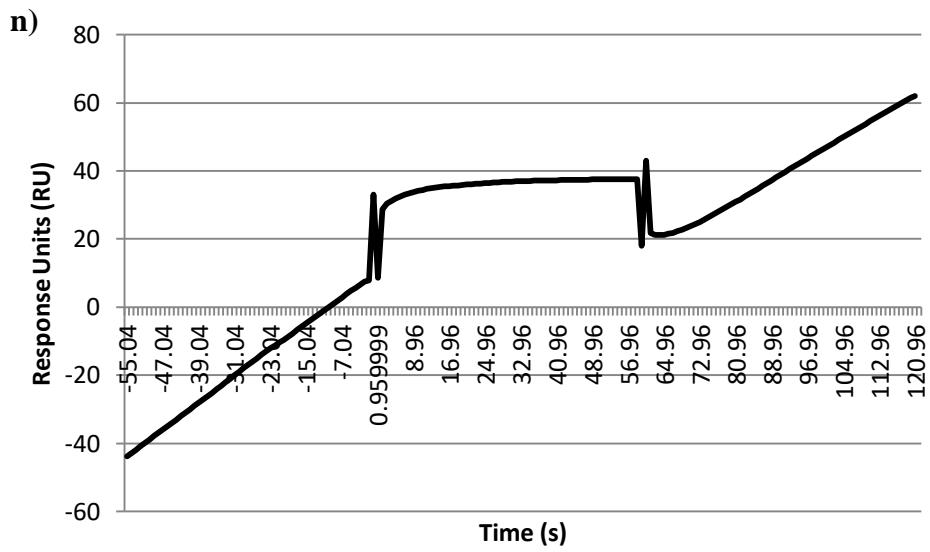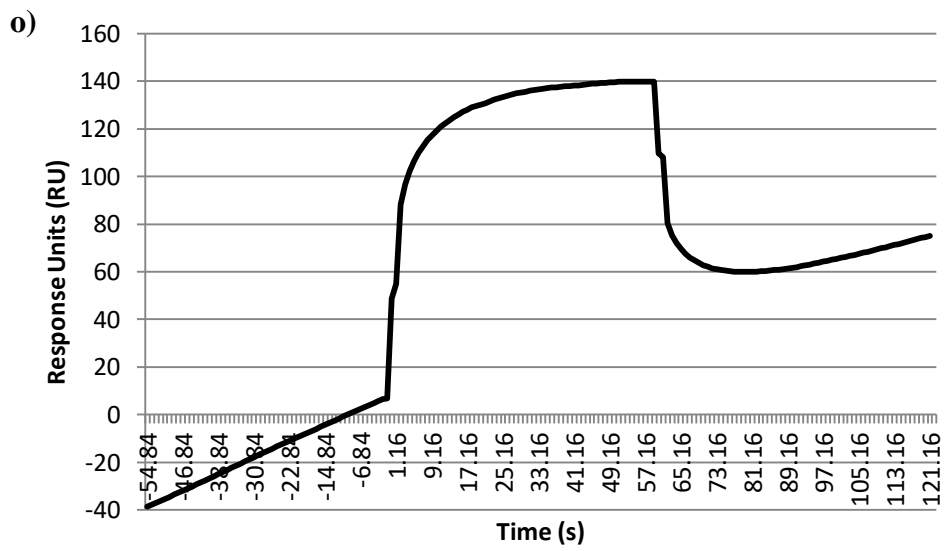

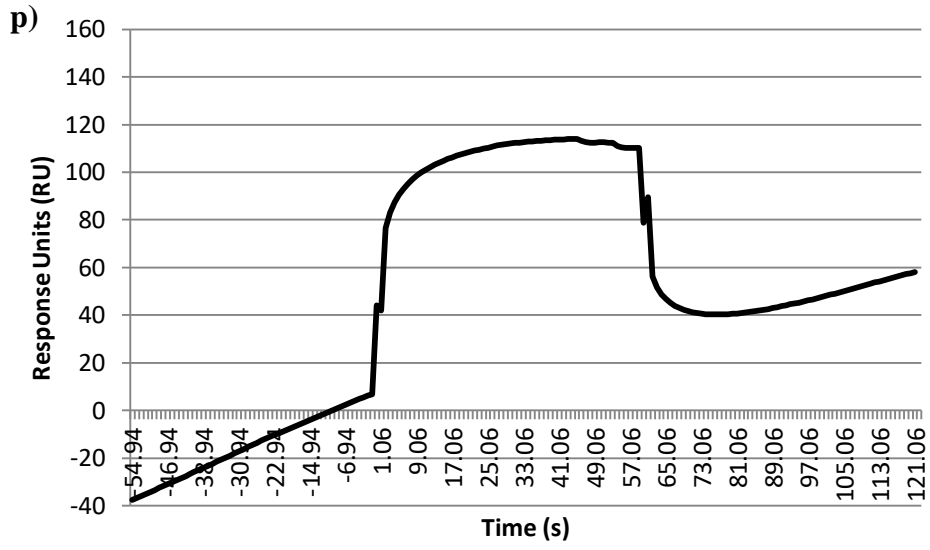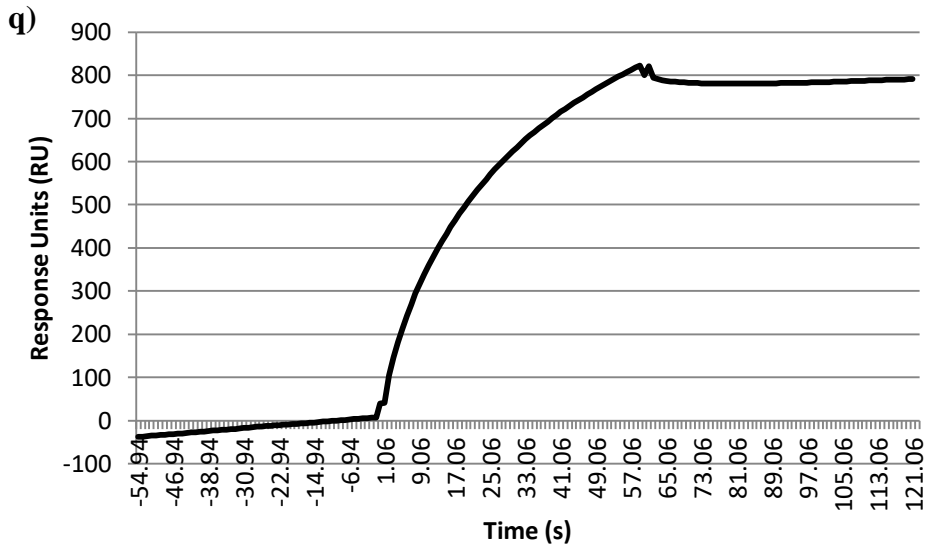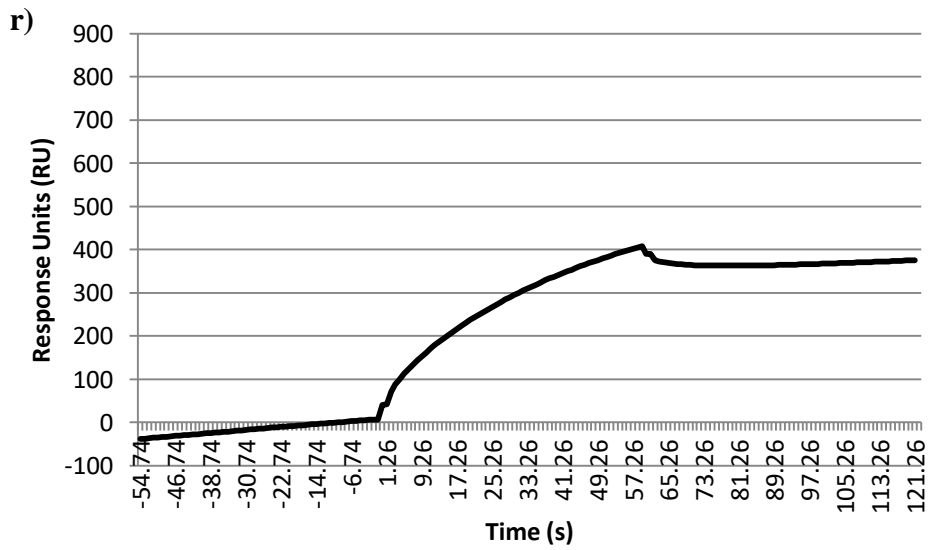

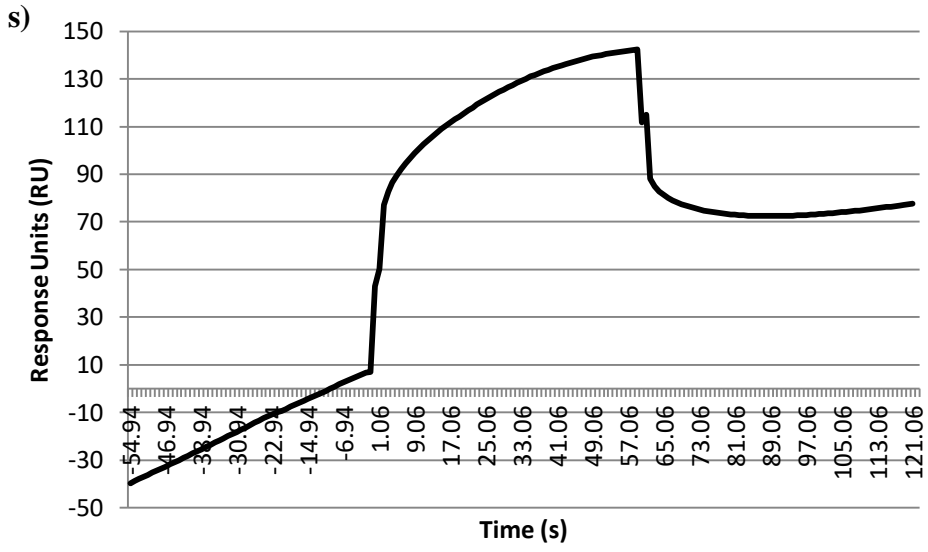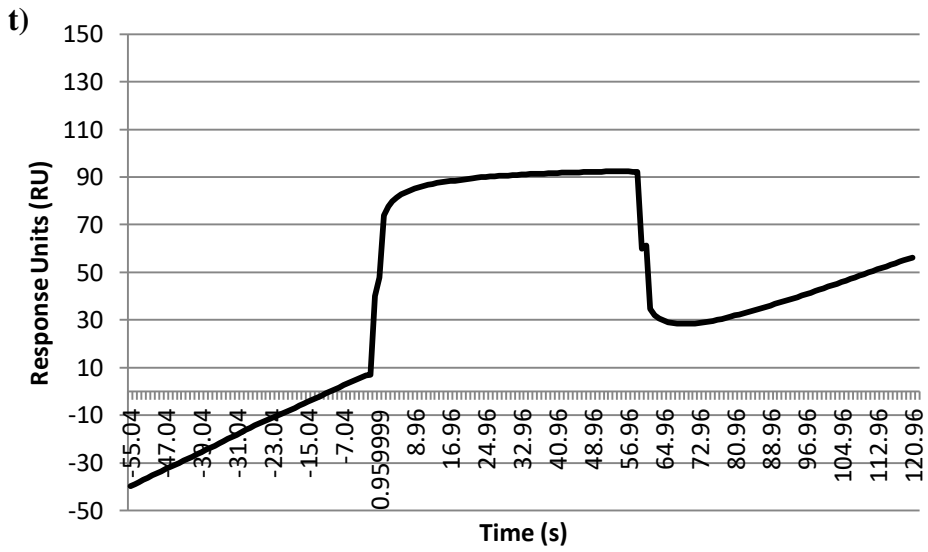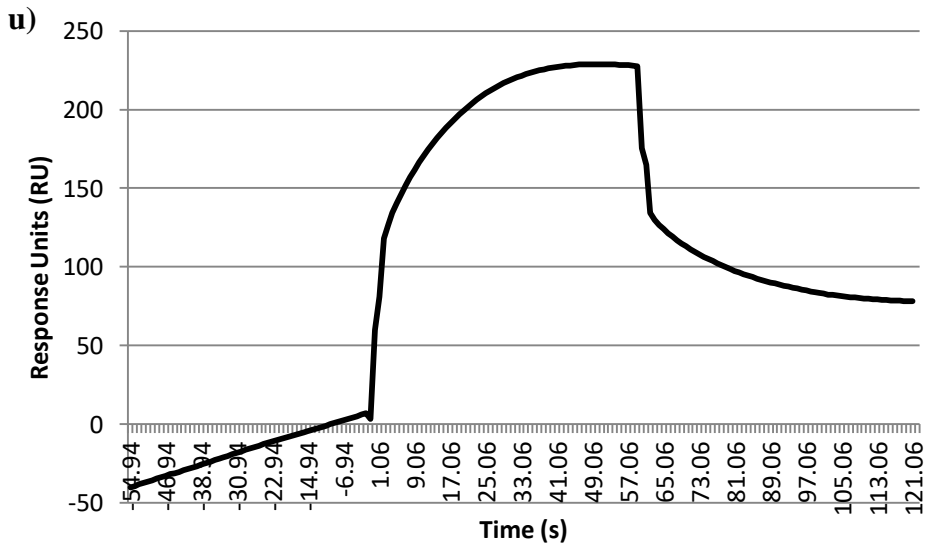

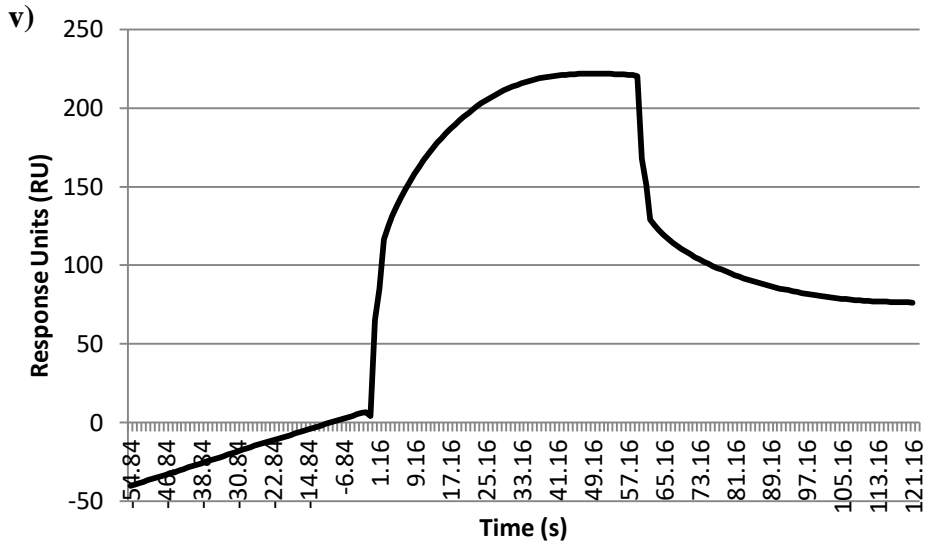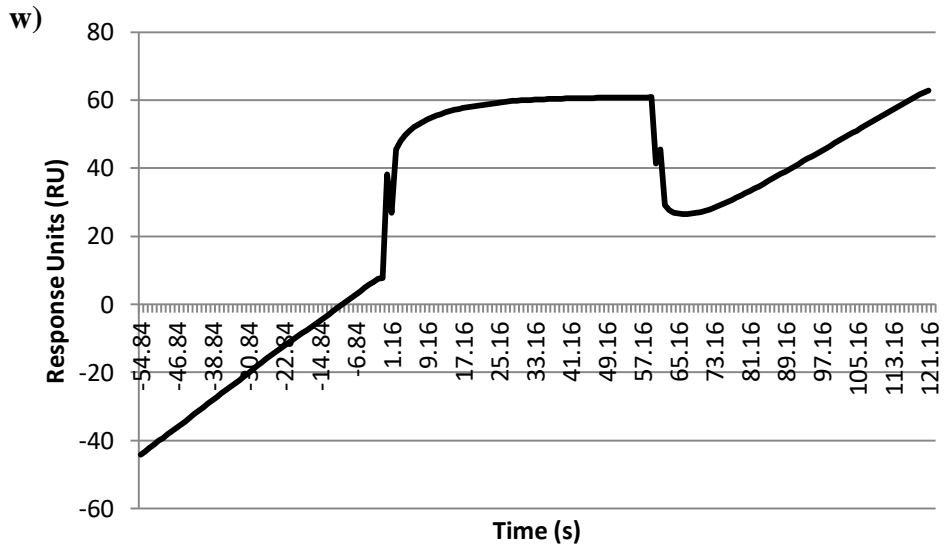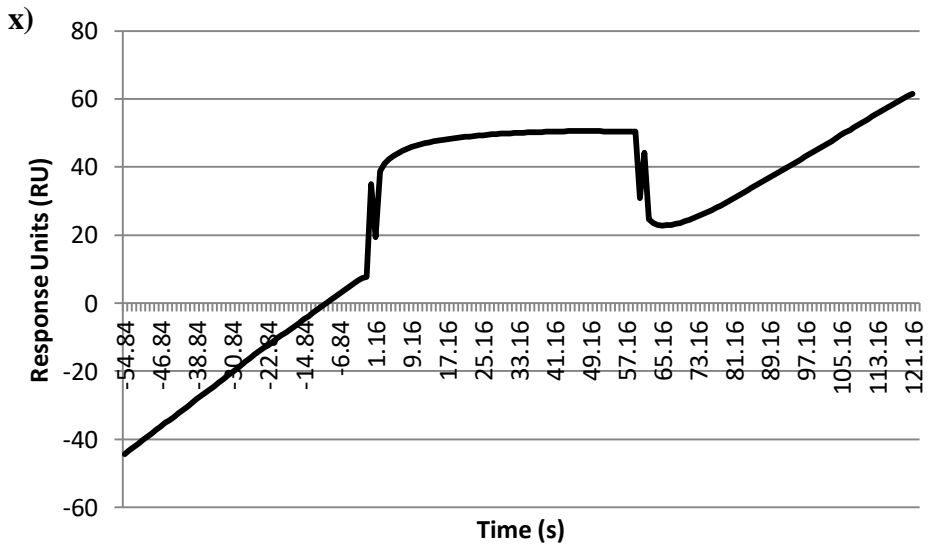



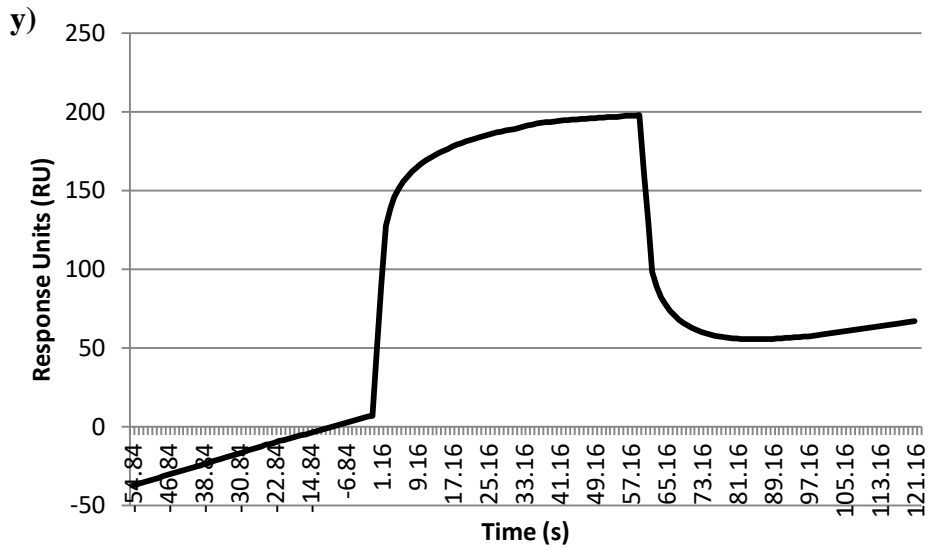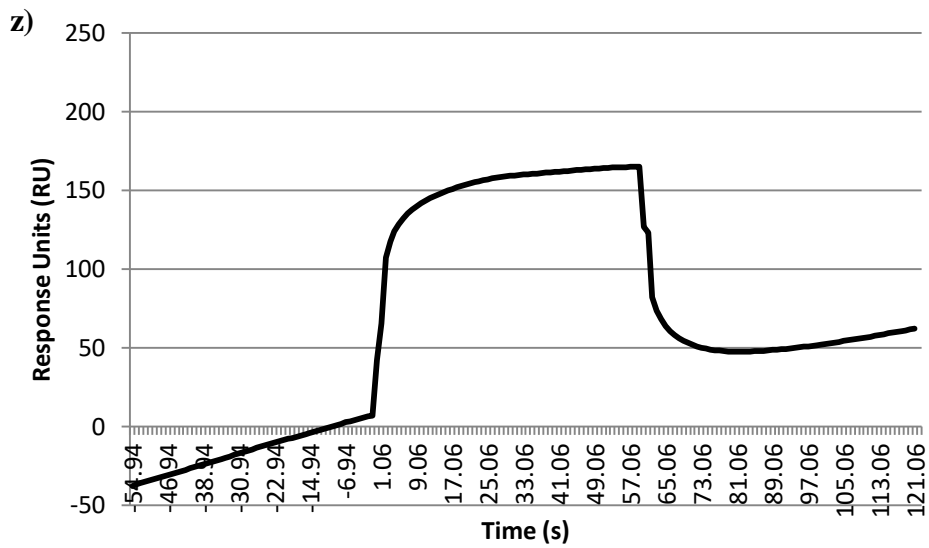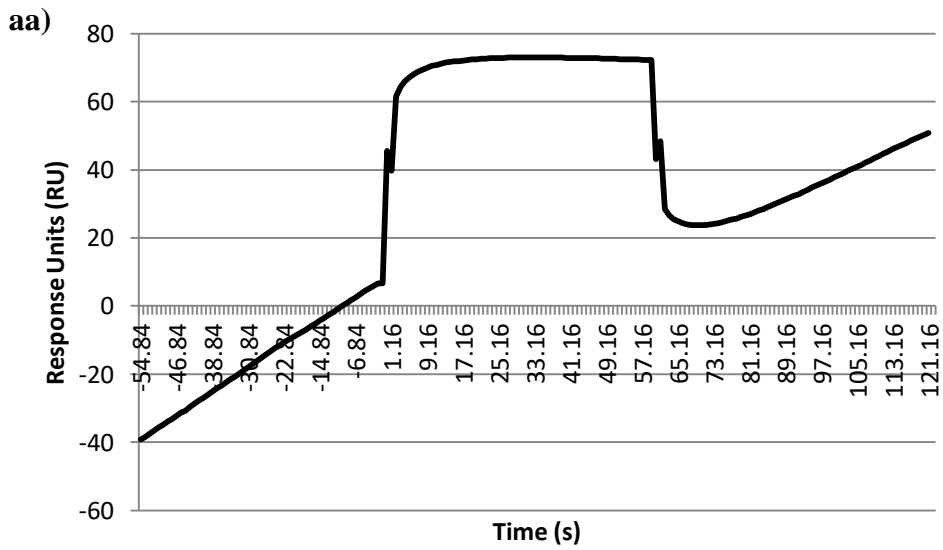

ab)

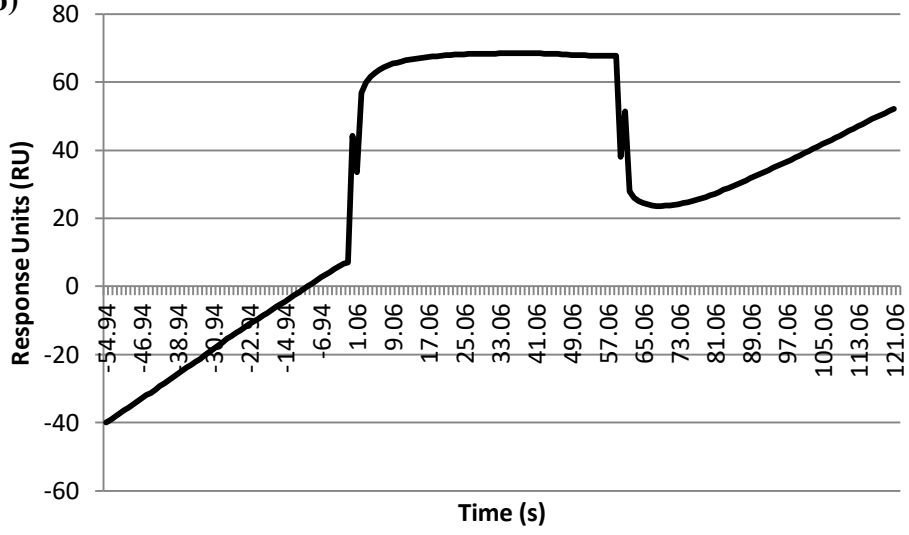

ac)

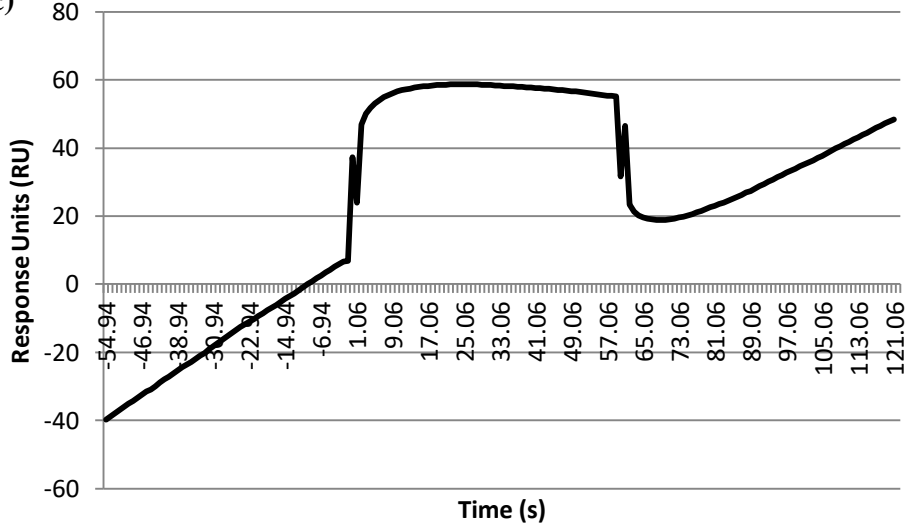

ad)

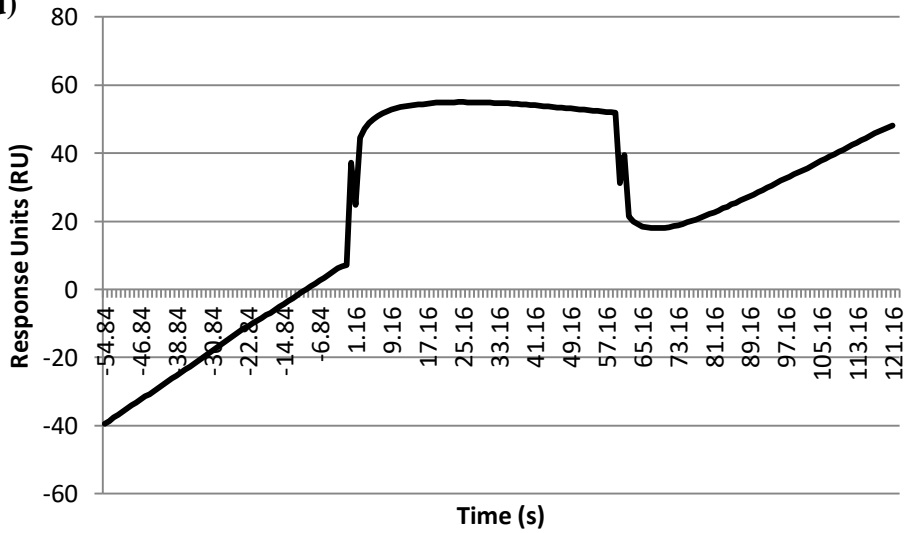

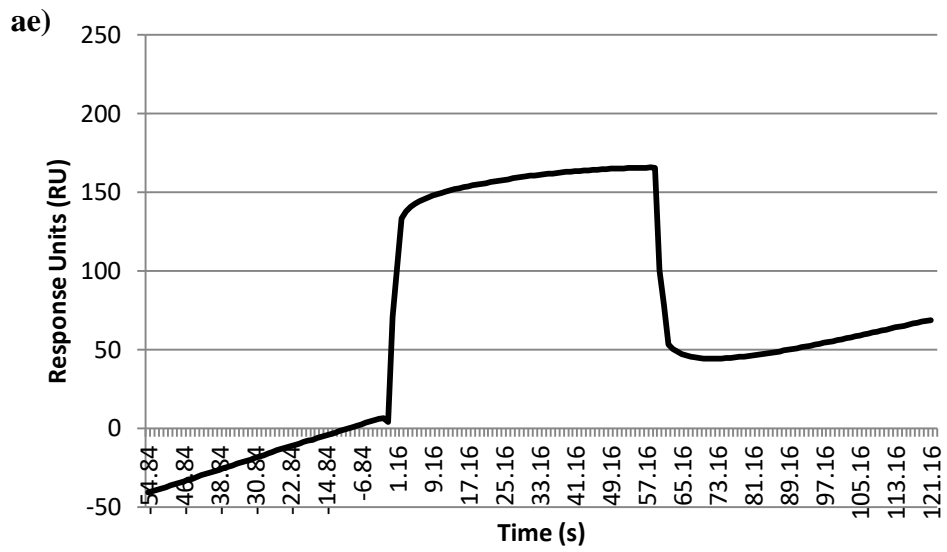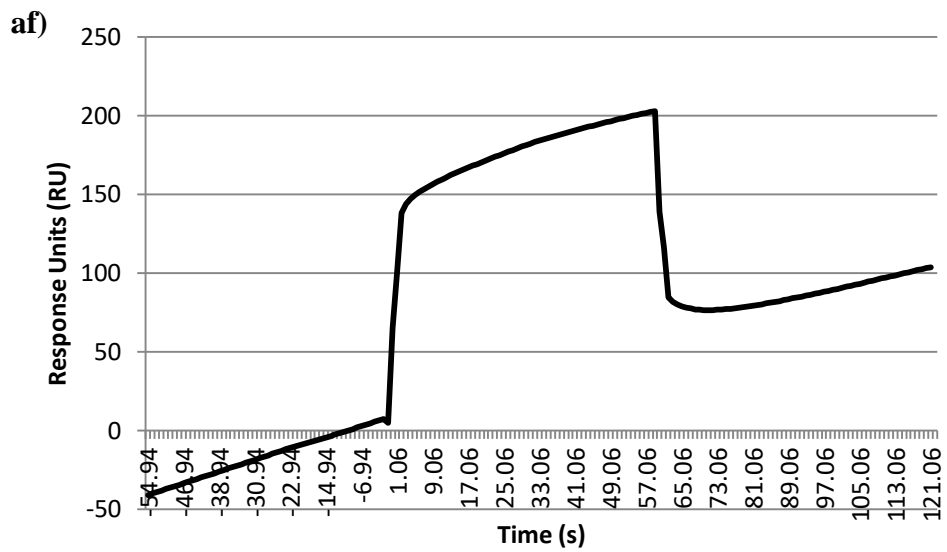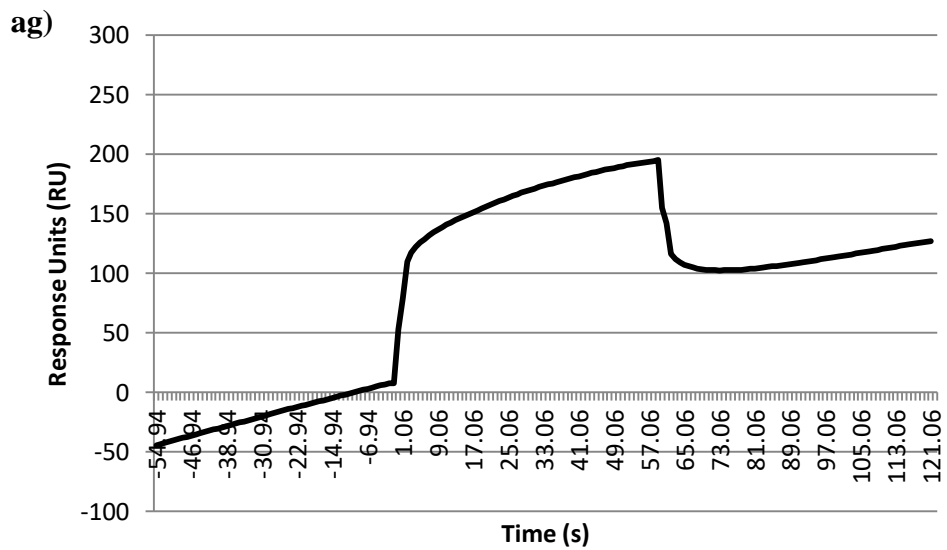

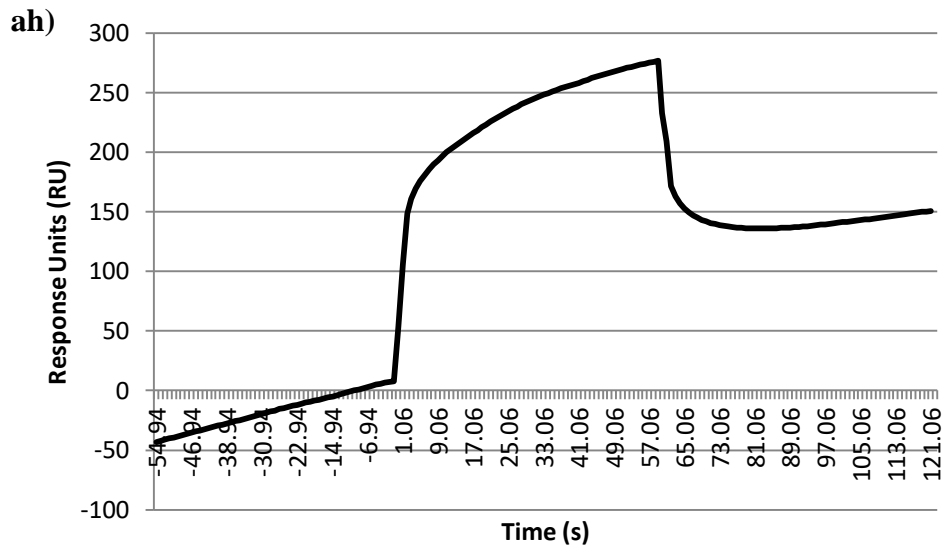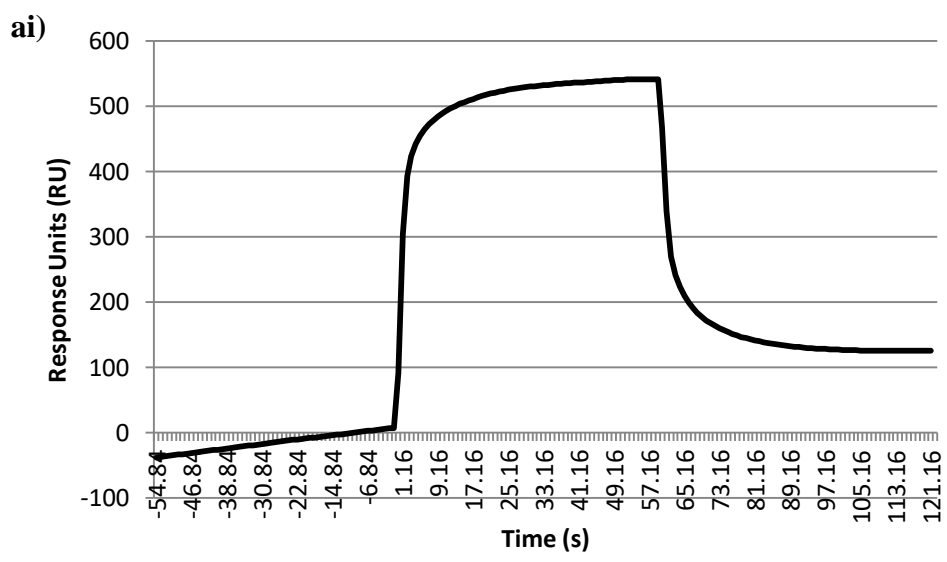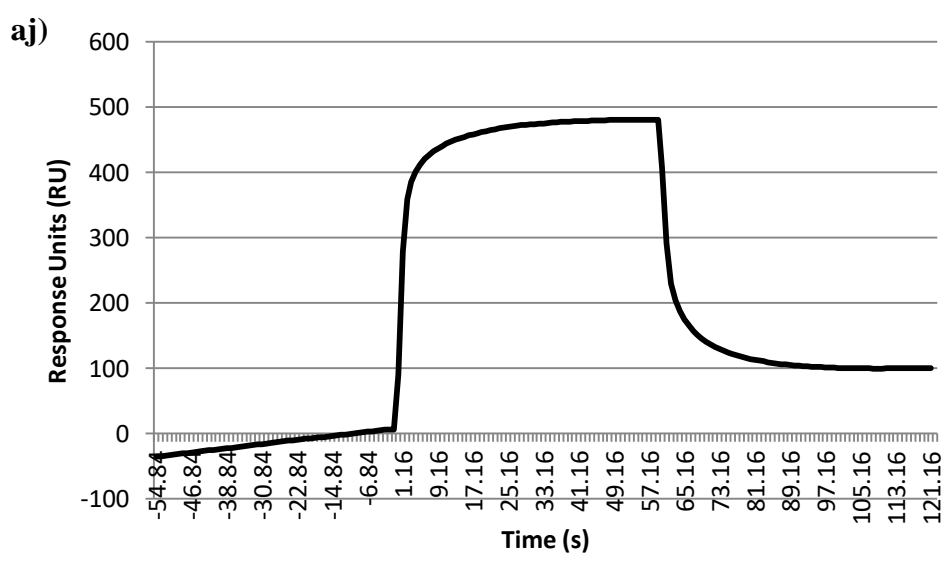

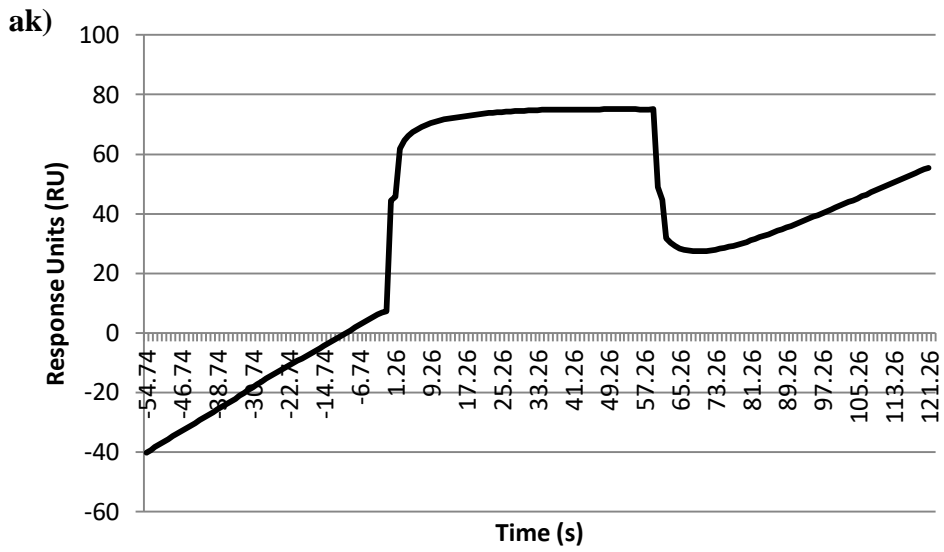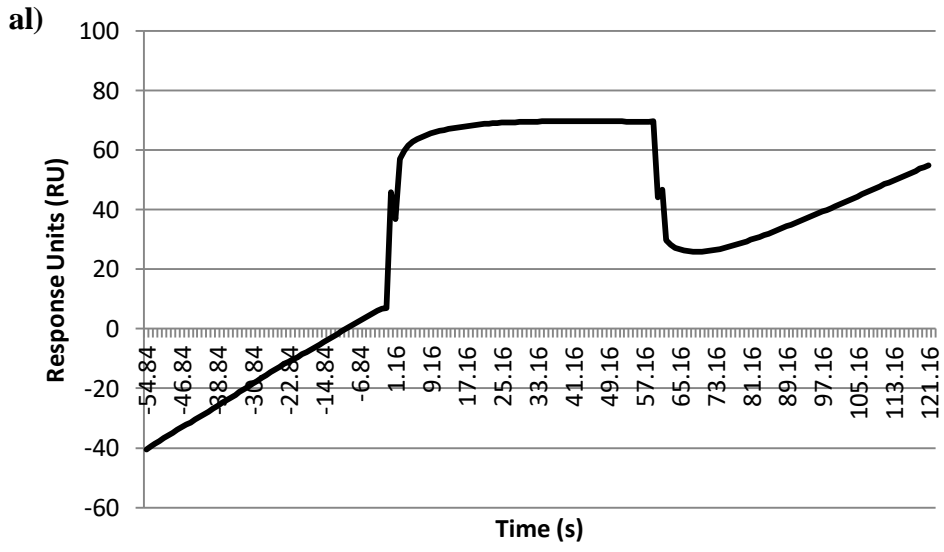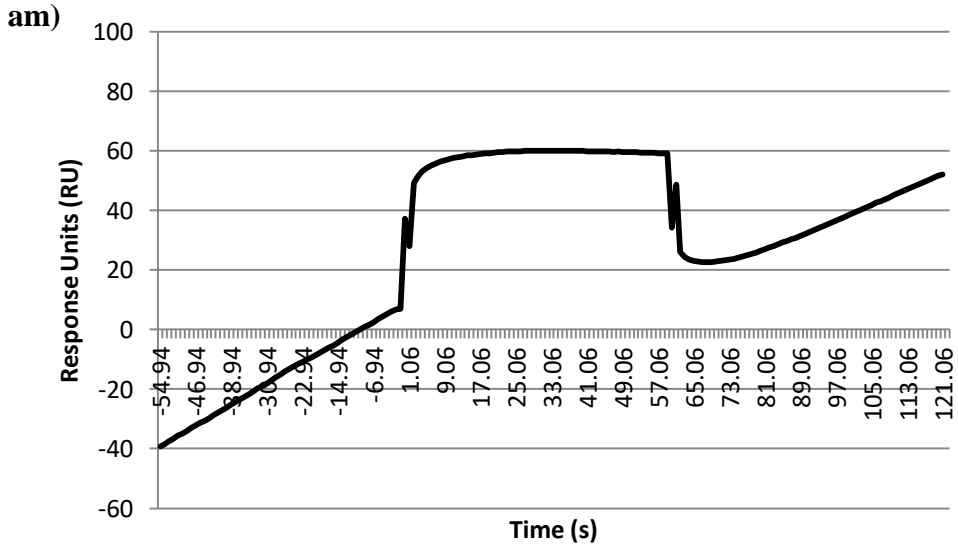

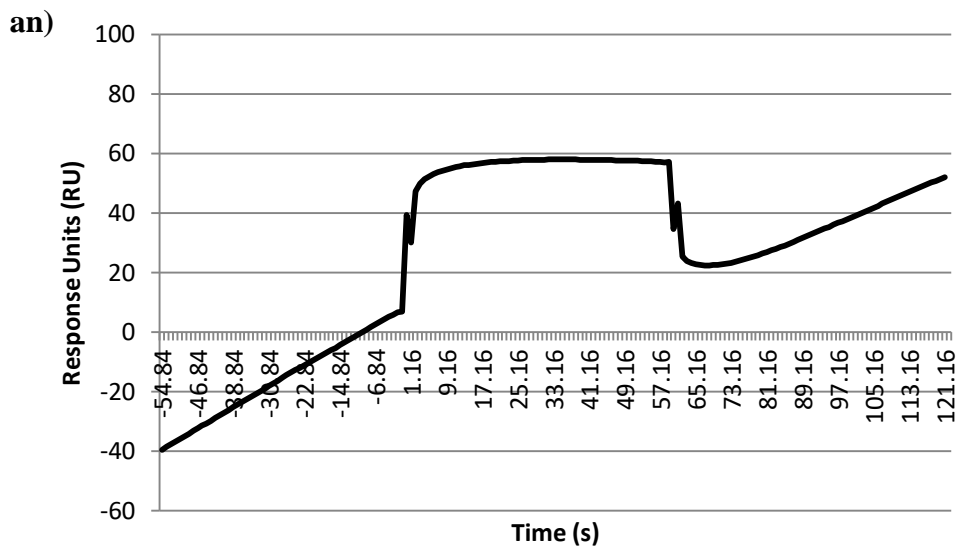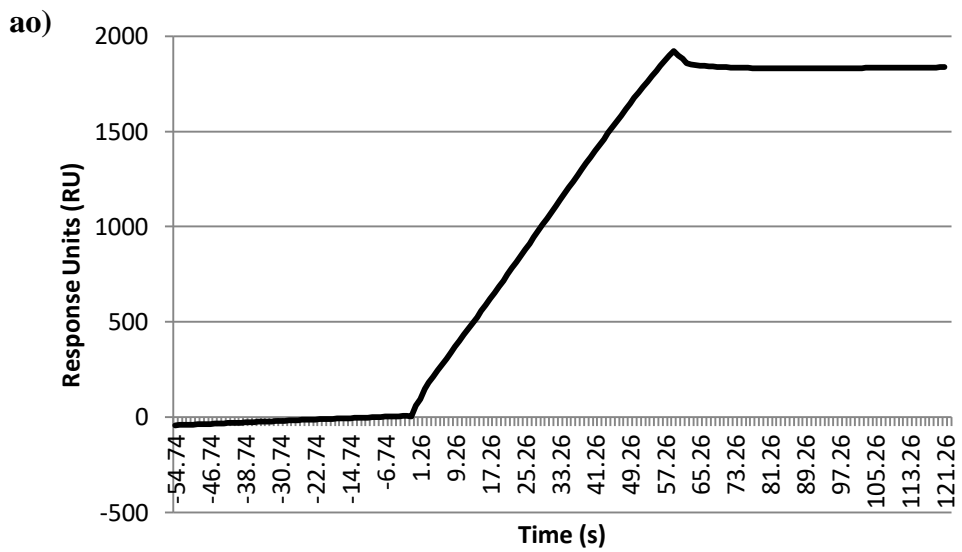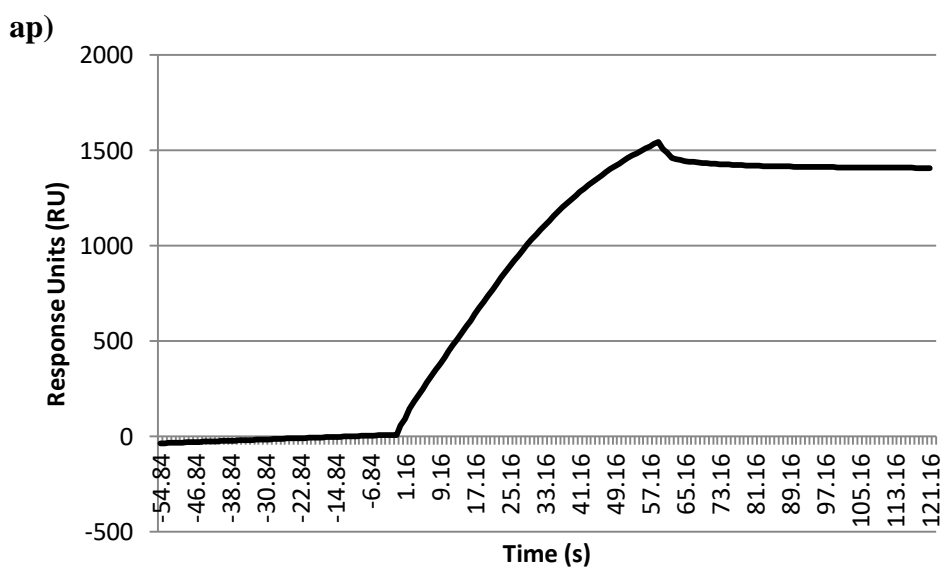

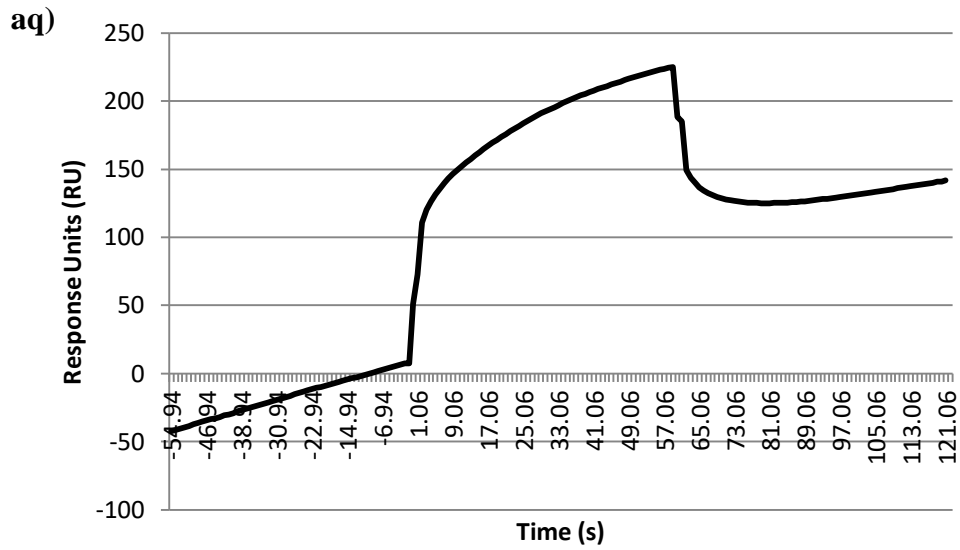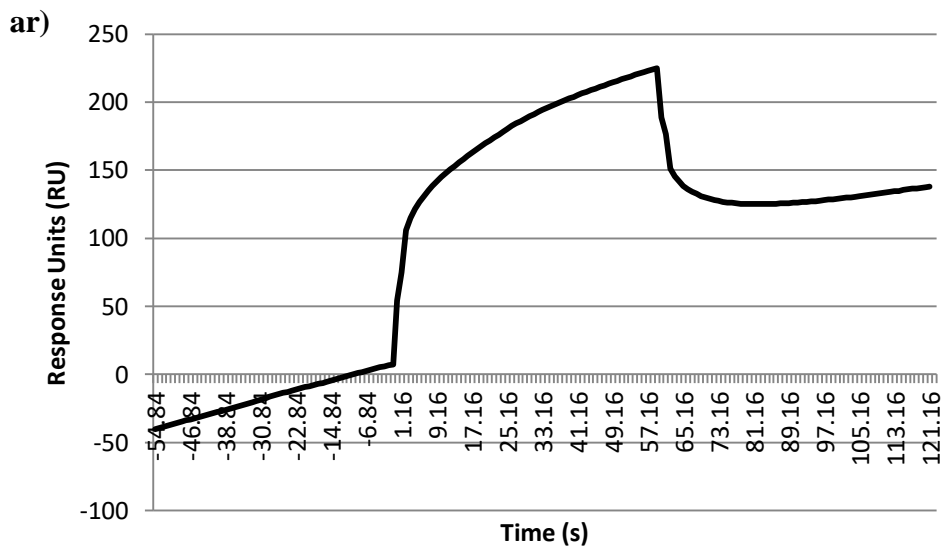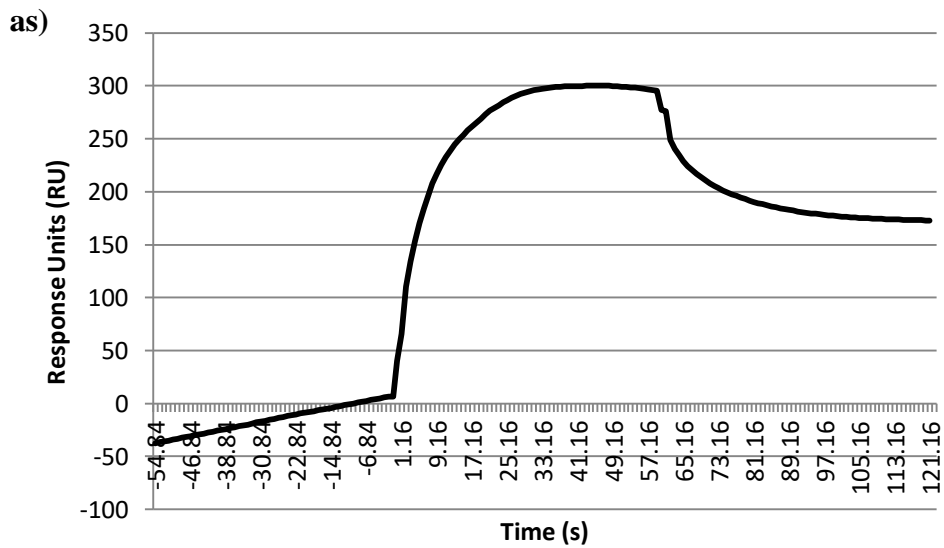

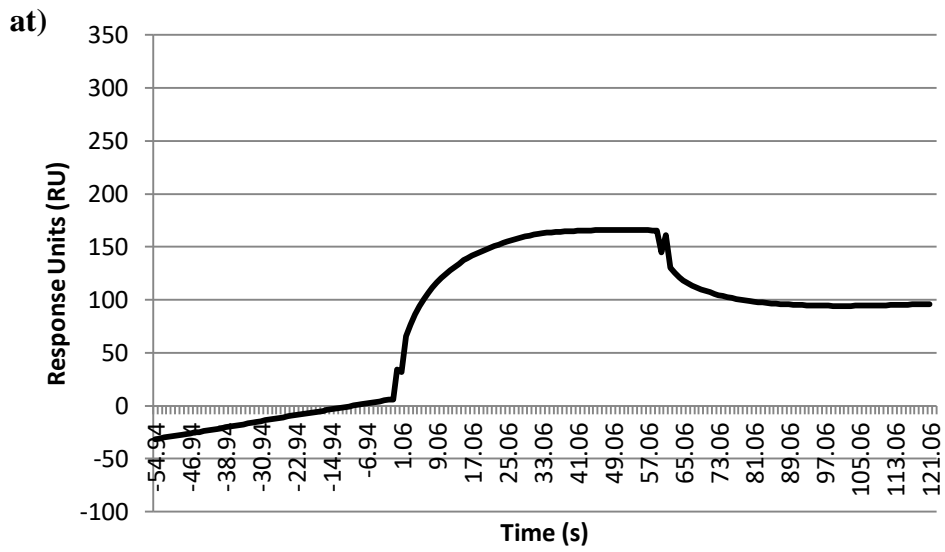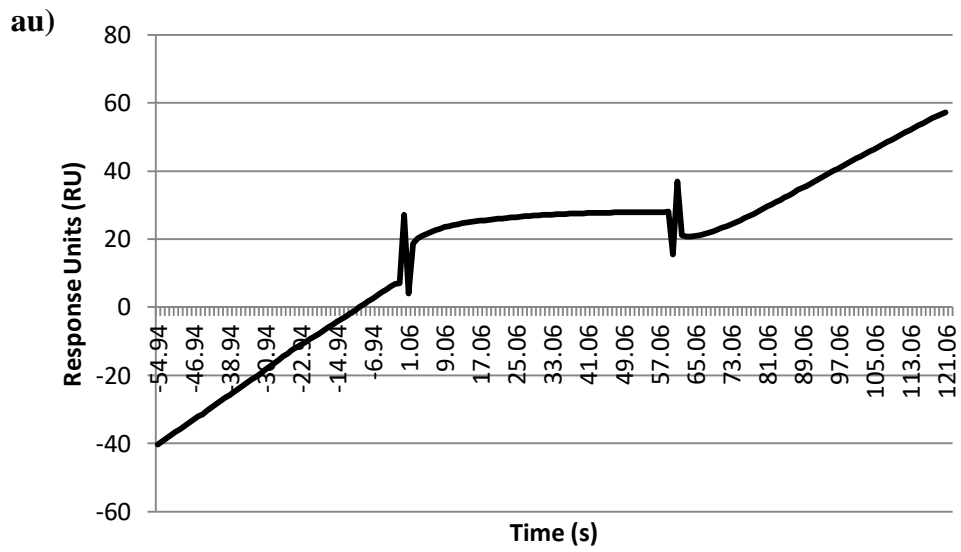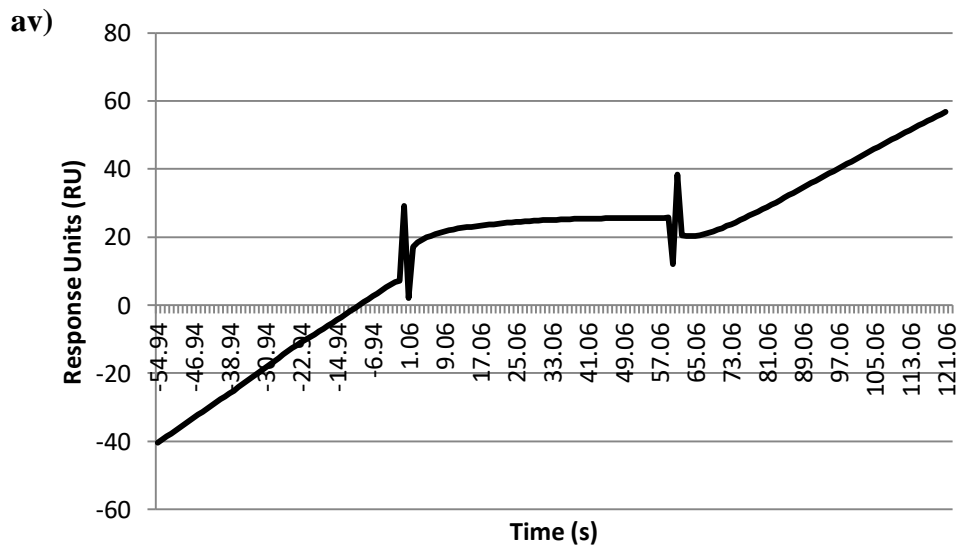



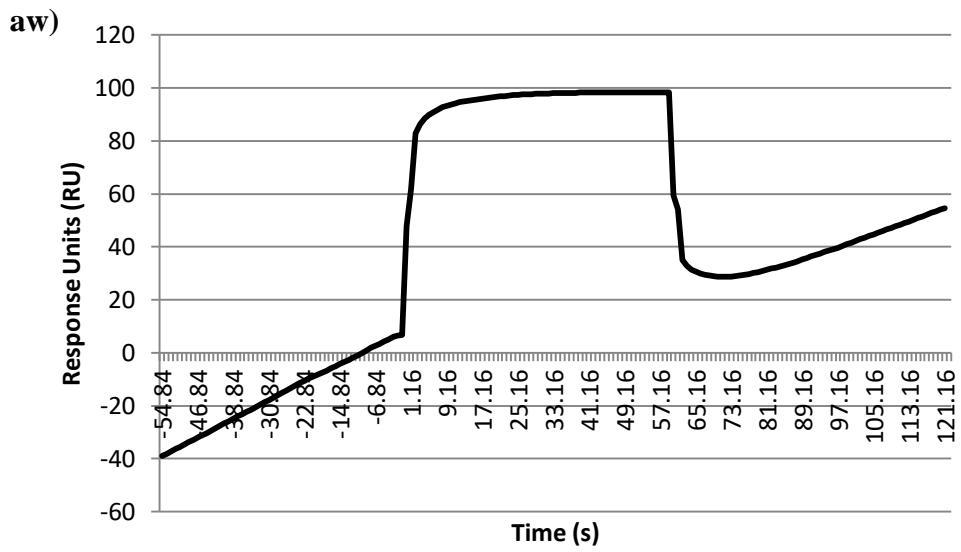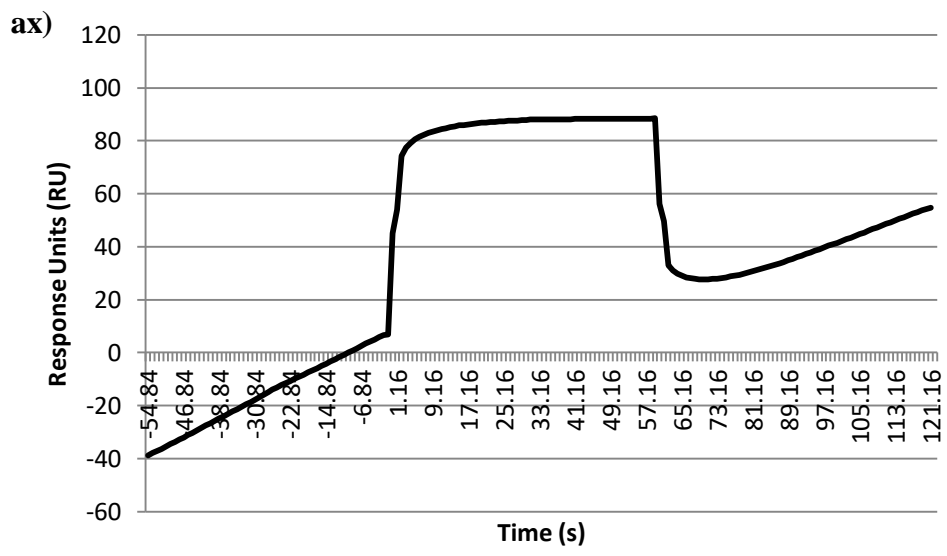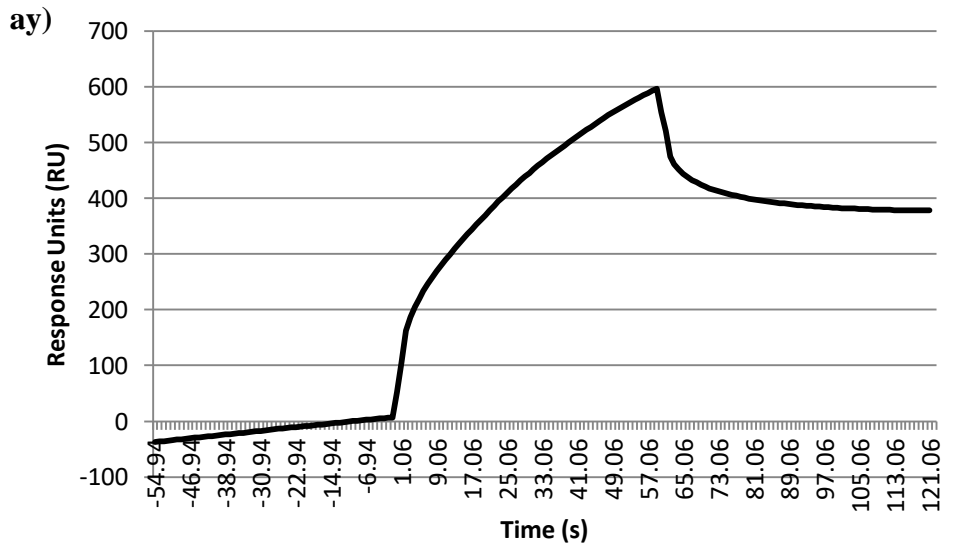

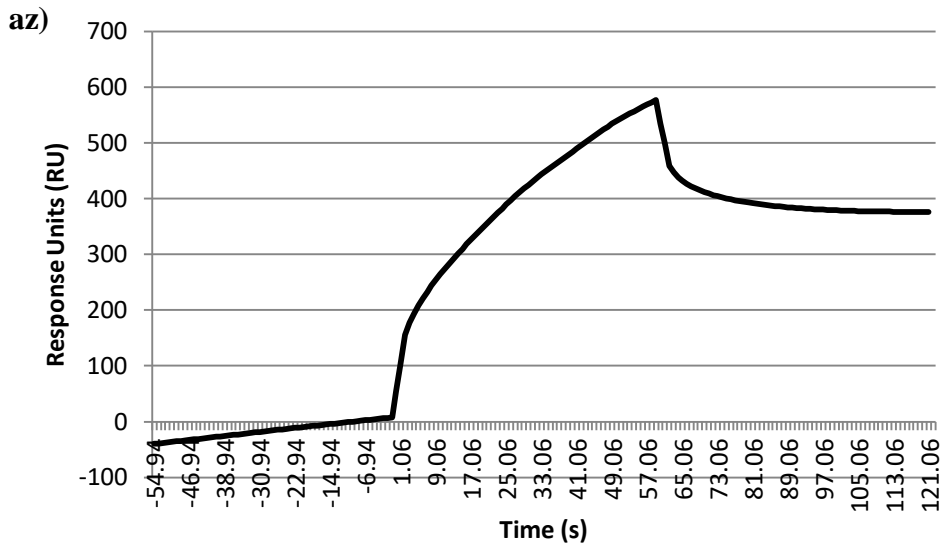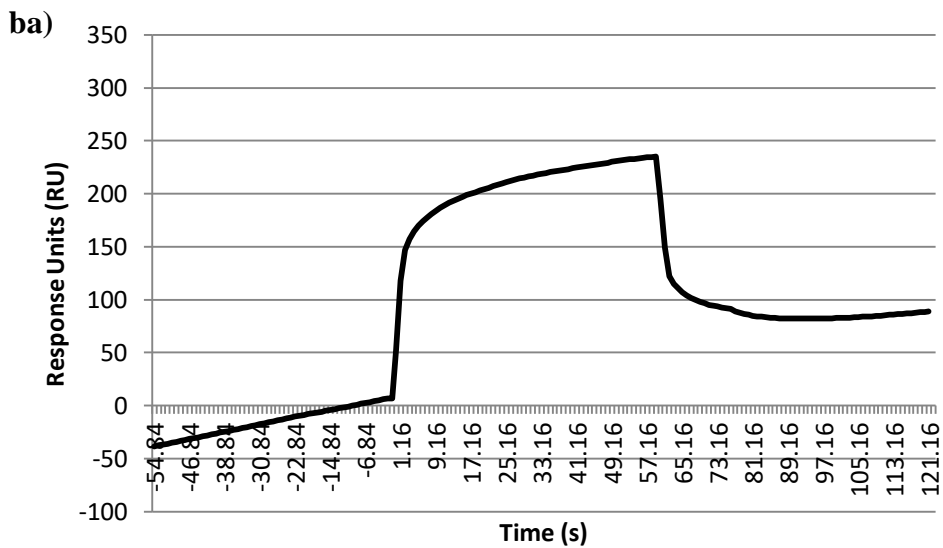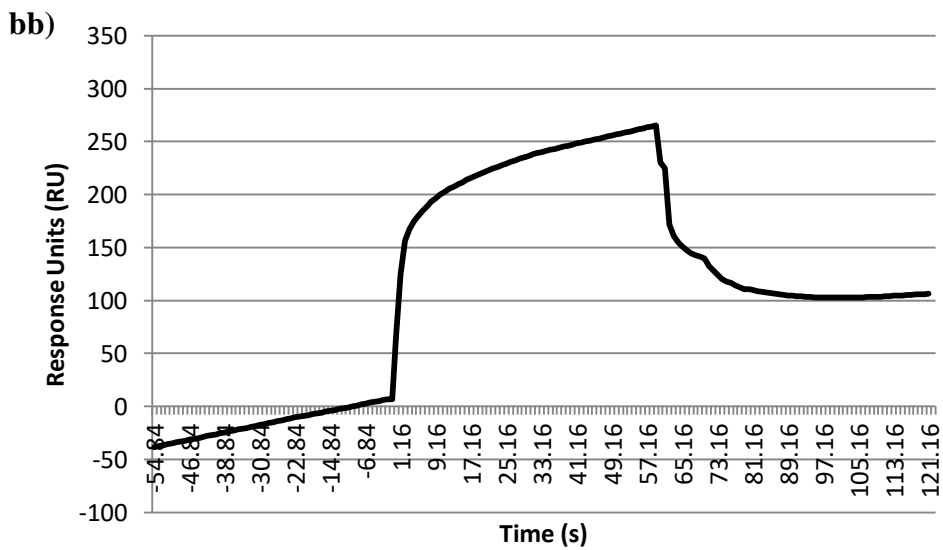

bc)

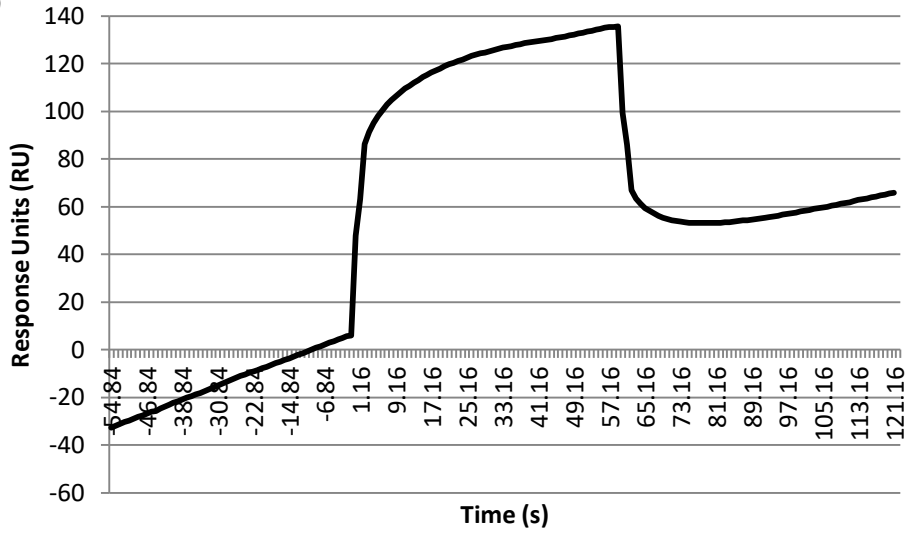

bd)

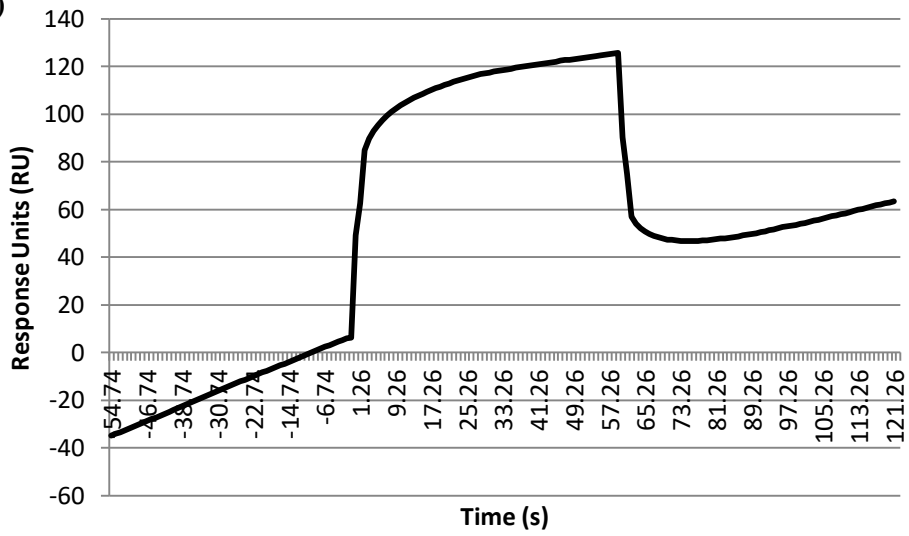

be)

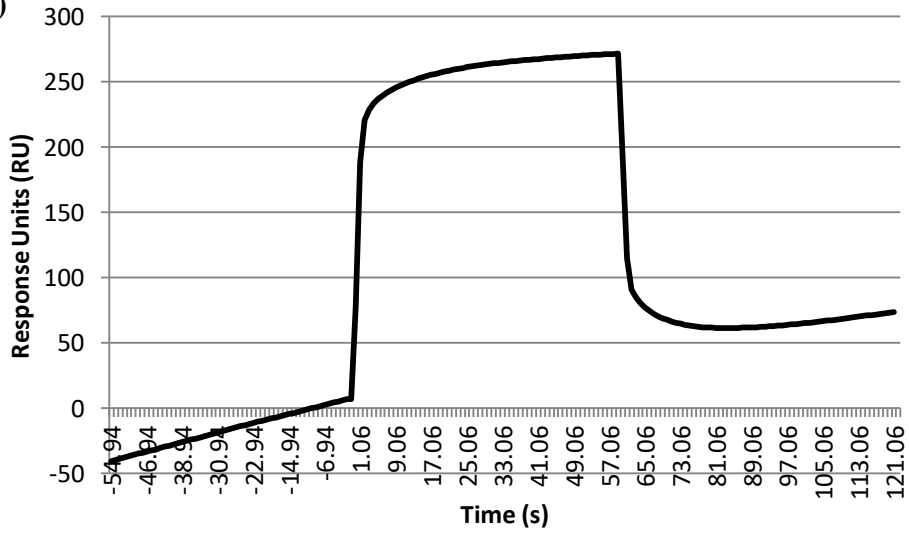

bf)

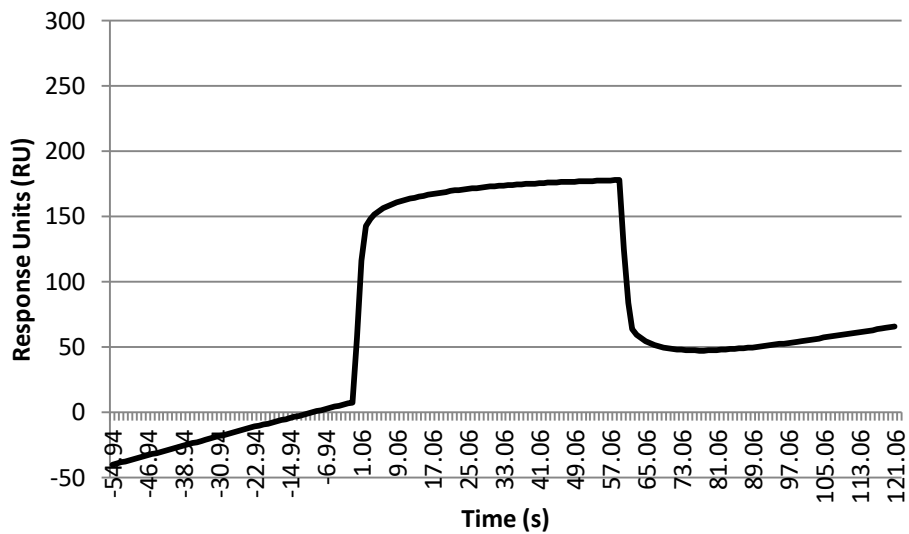

bg)

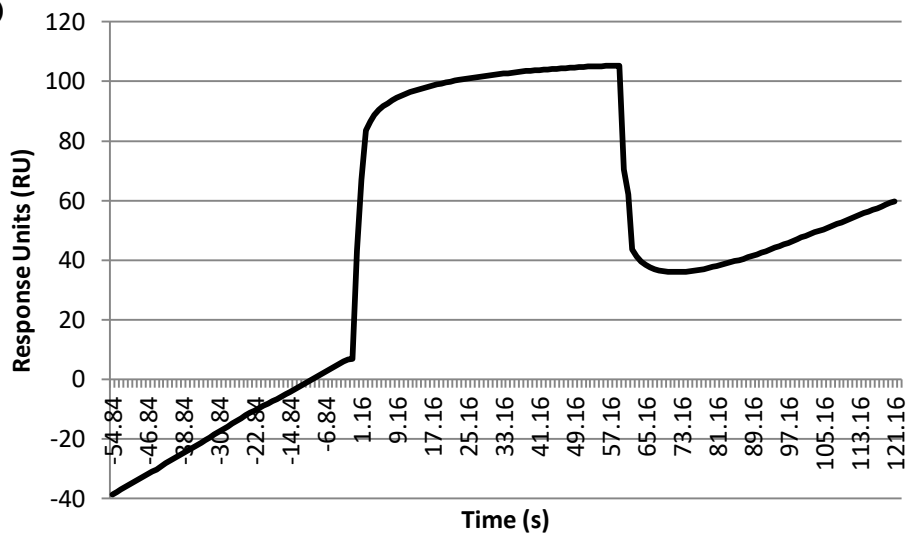

bh)

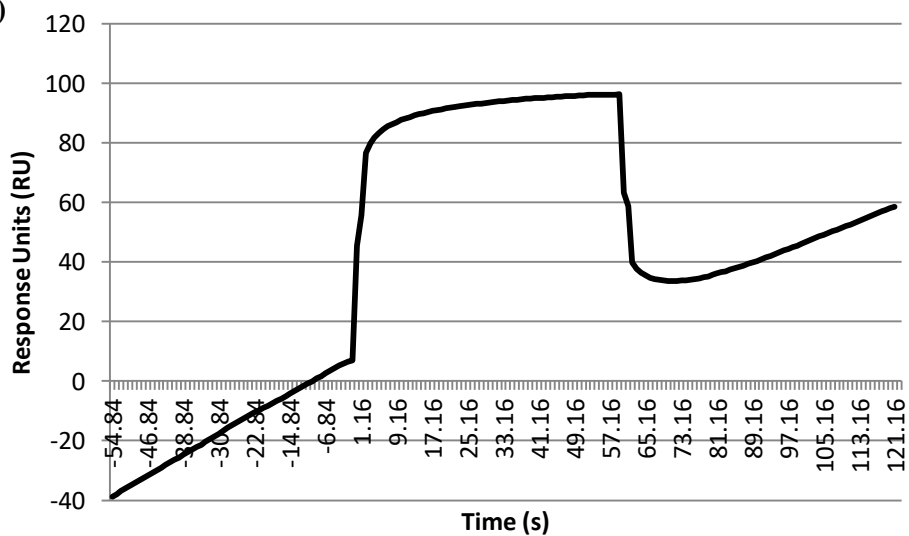

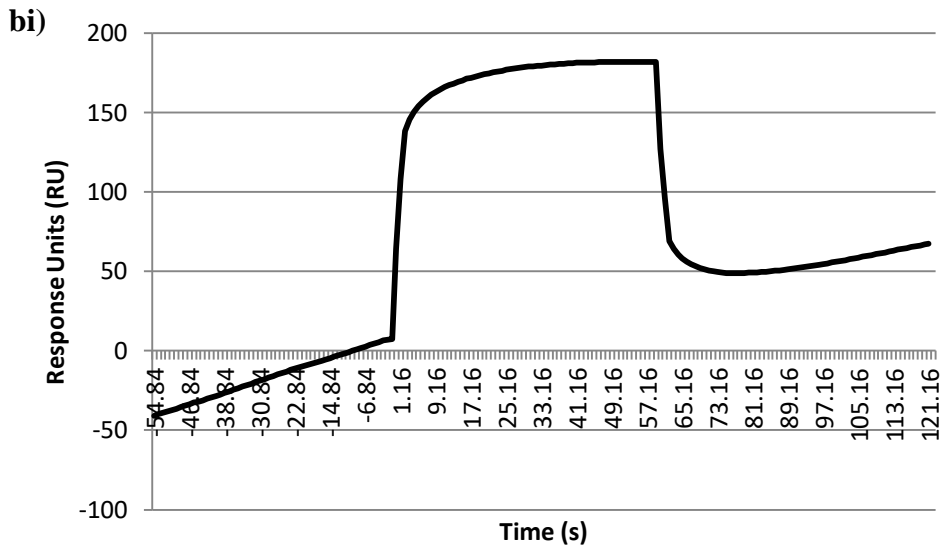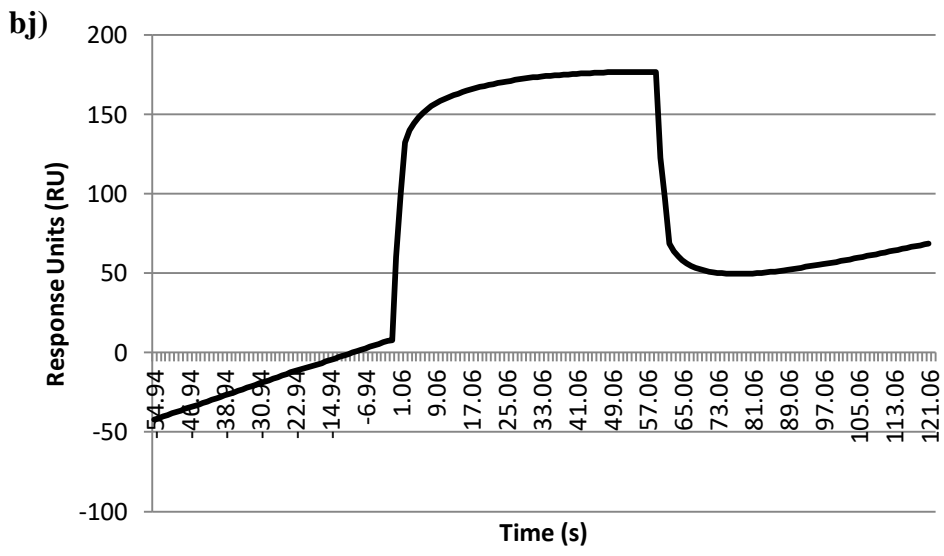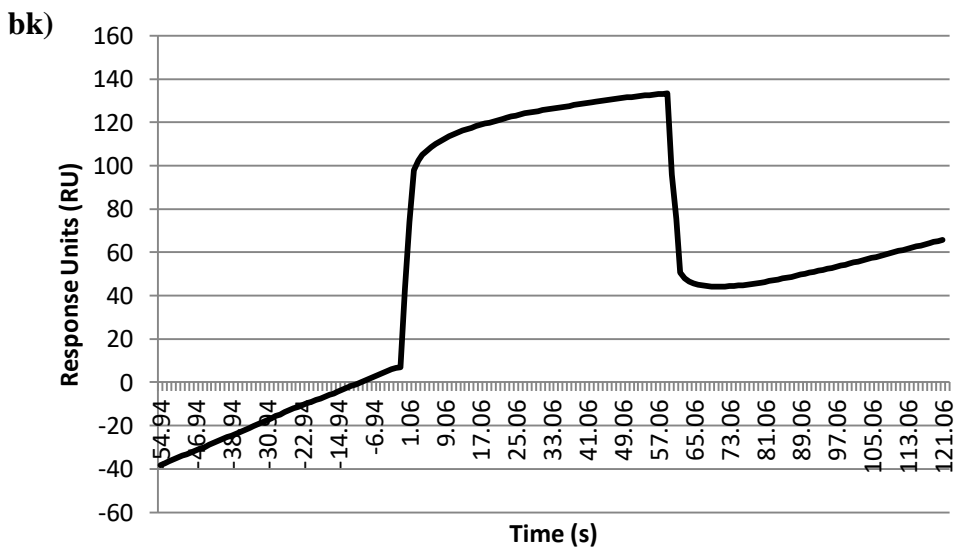

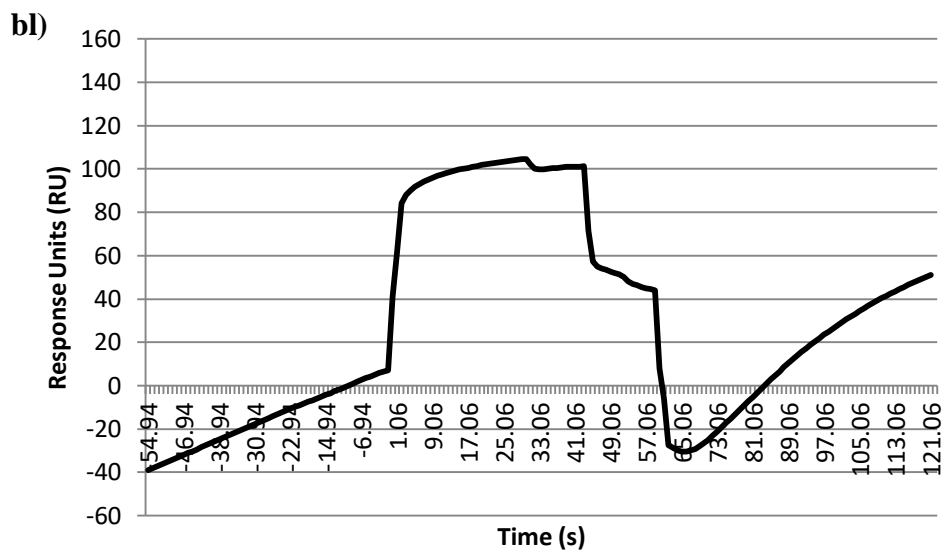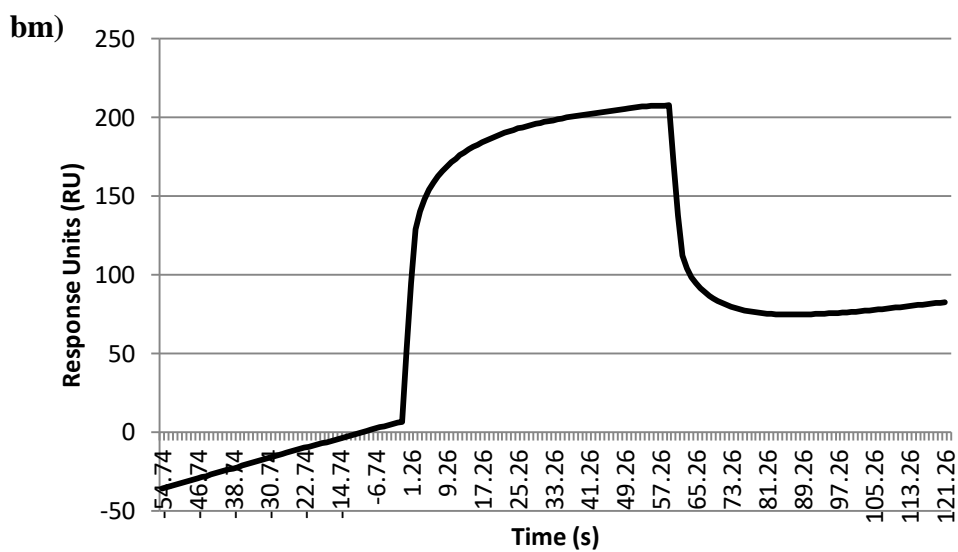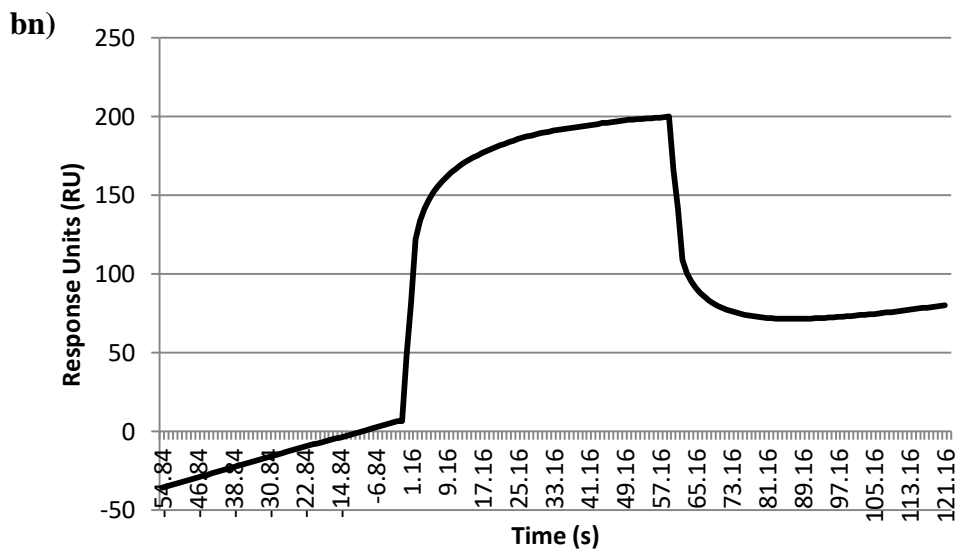

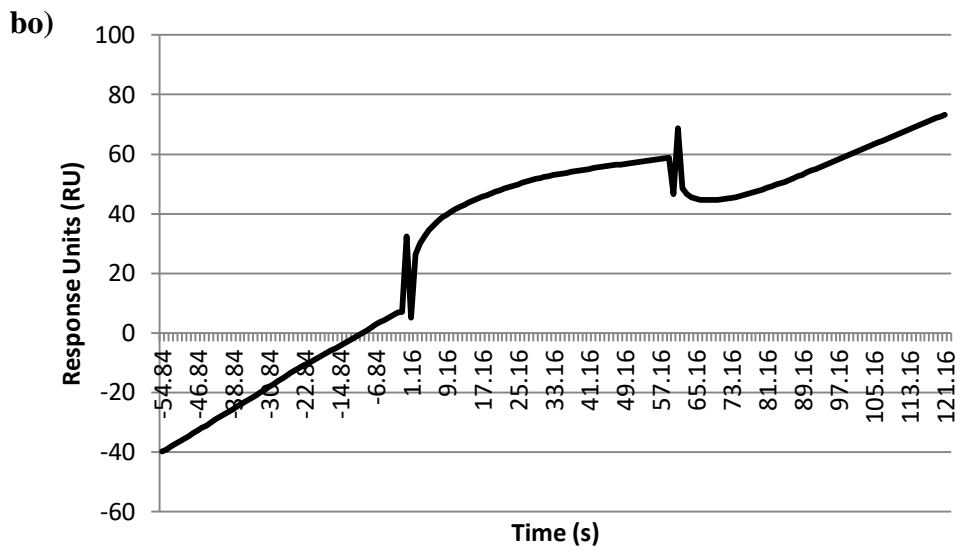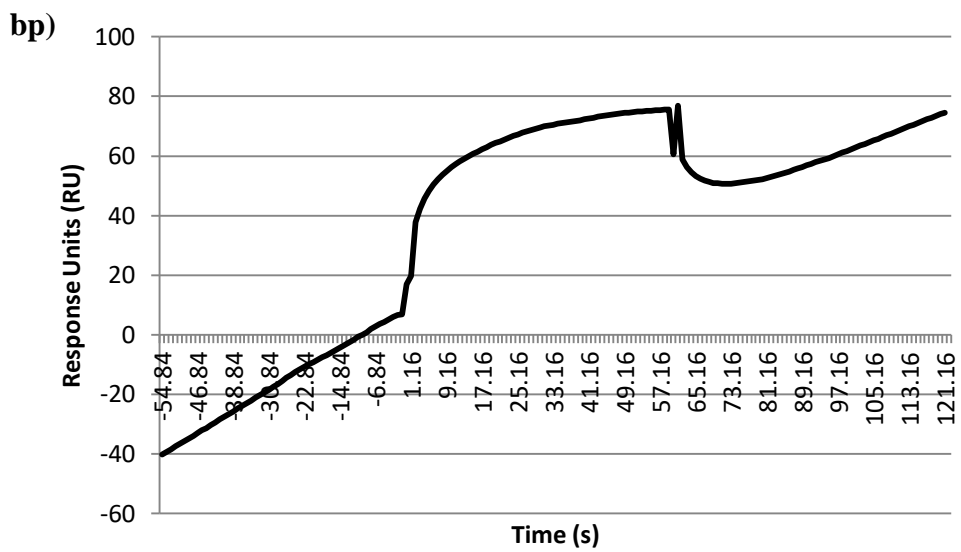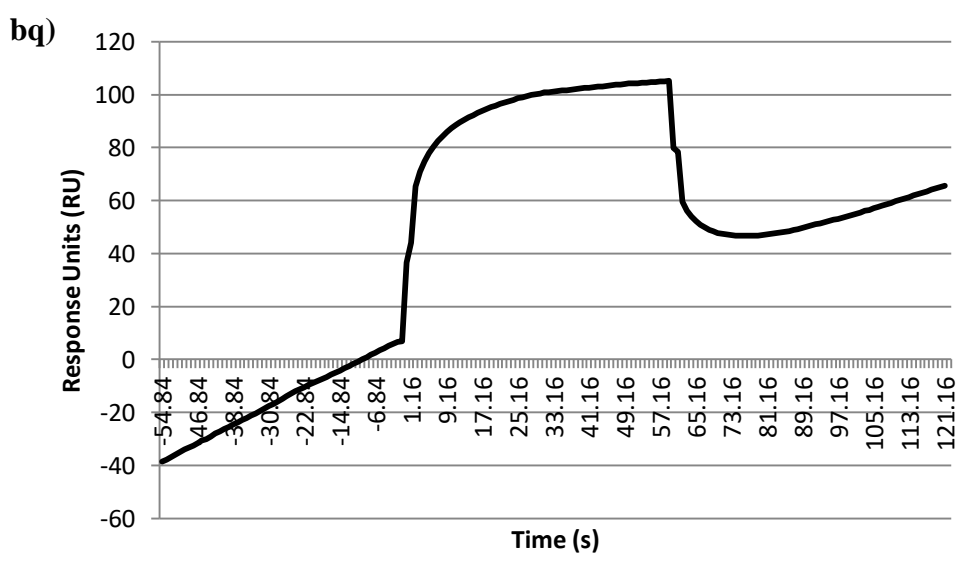

br)

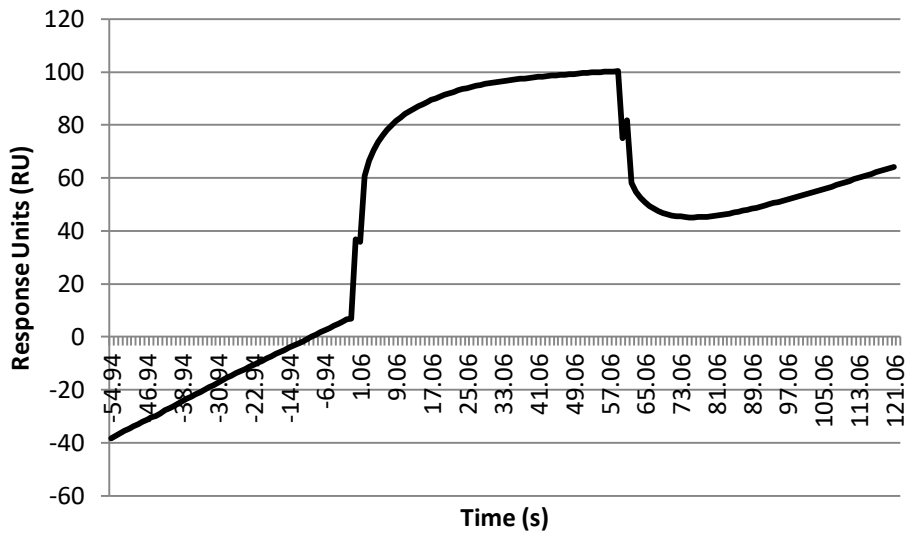

bs)

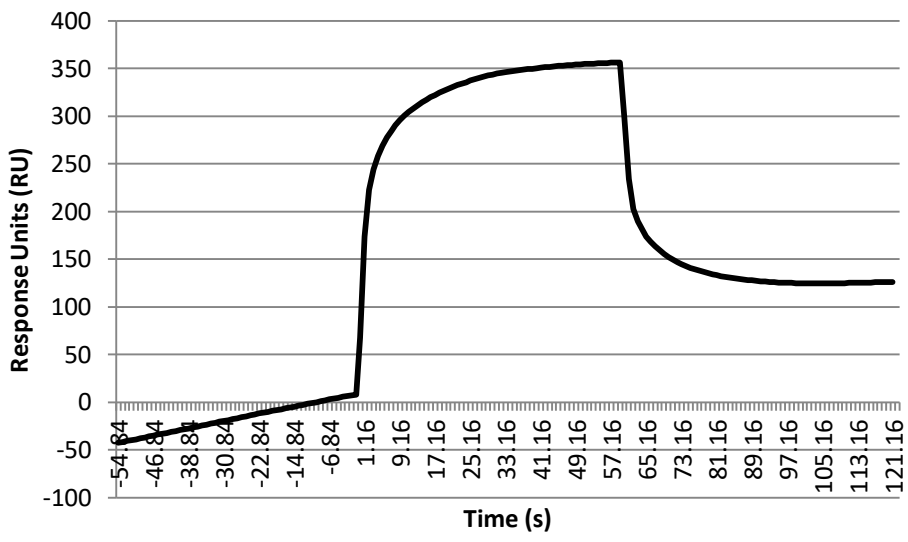

bt)

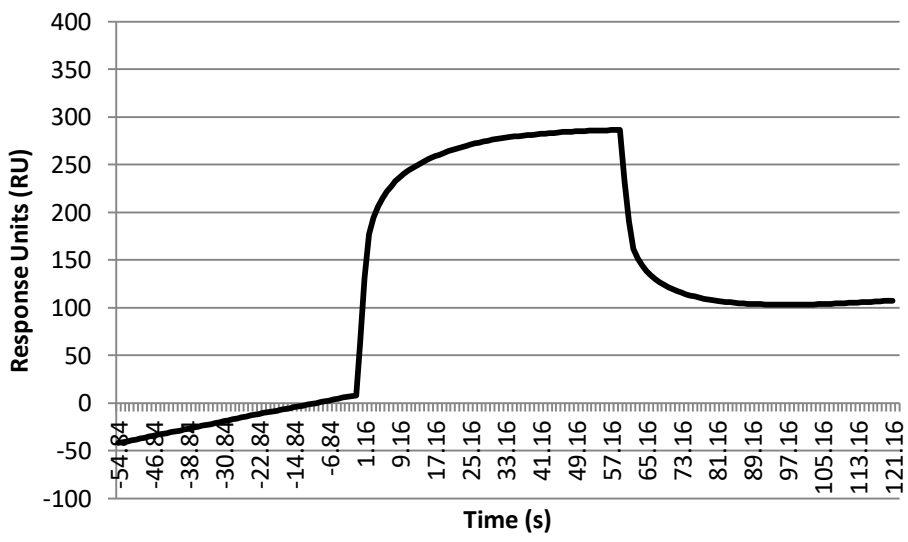



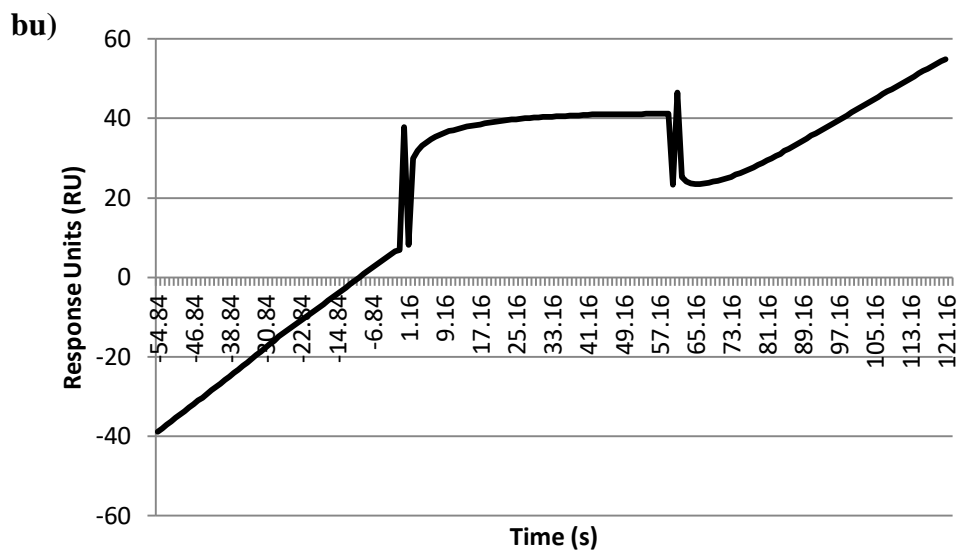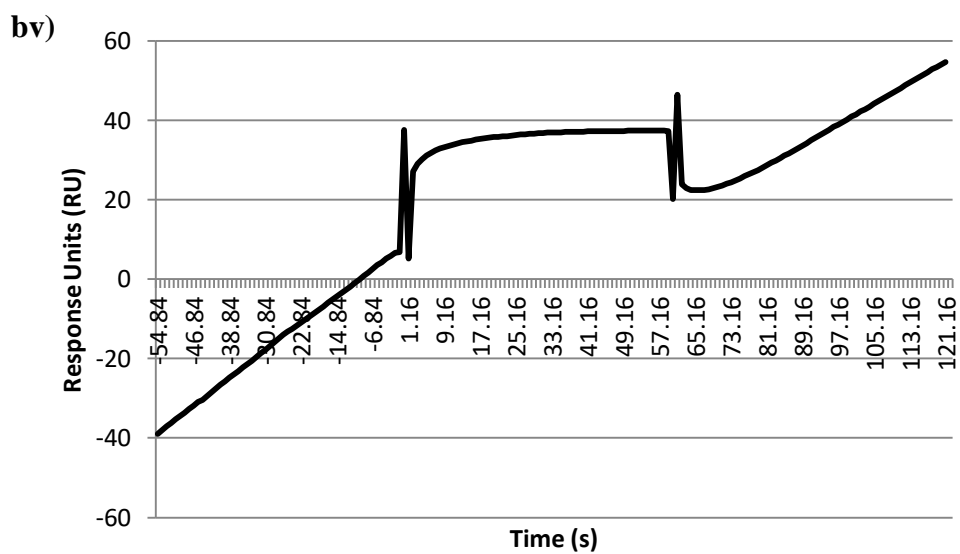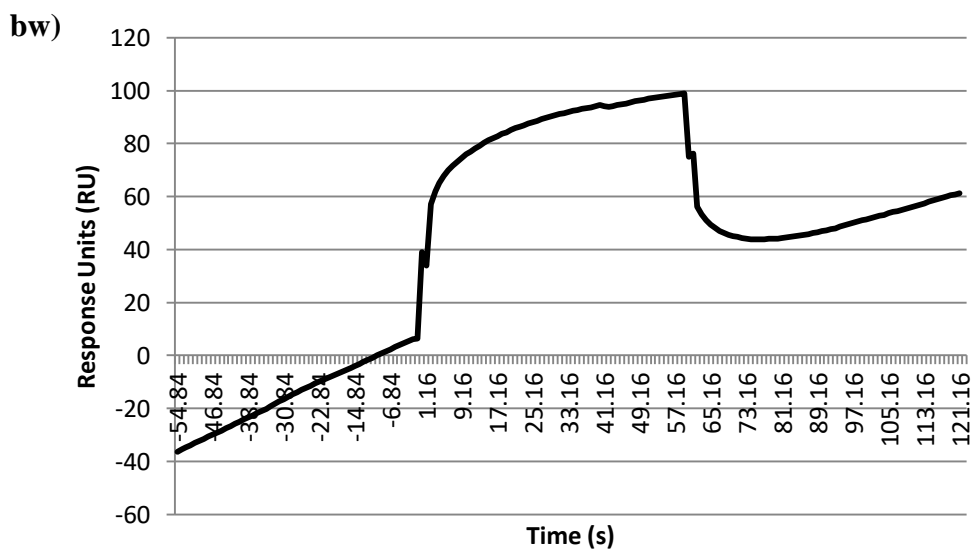

**bx)**

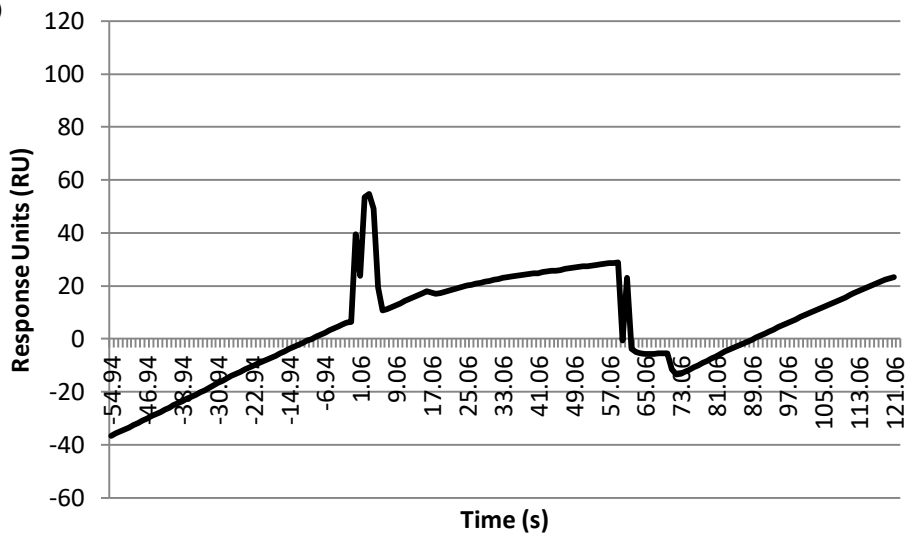

**by)**

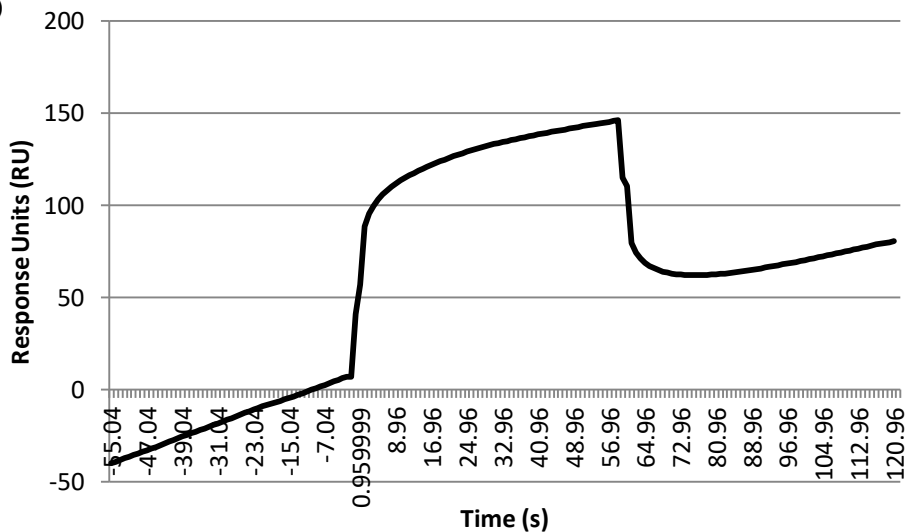

**bz)**

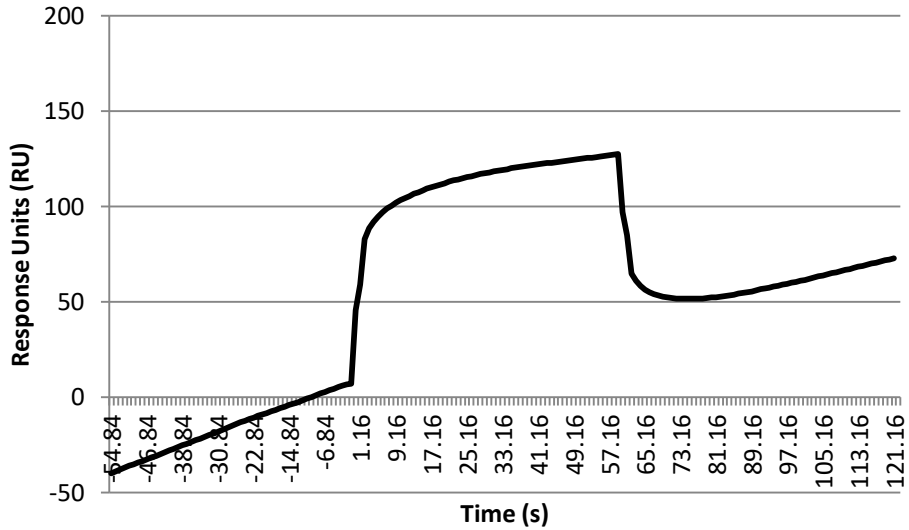

ca)

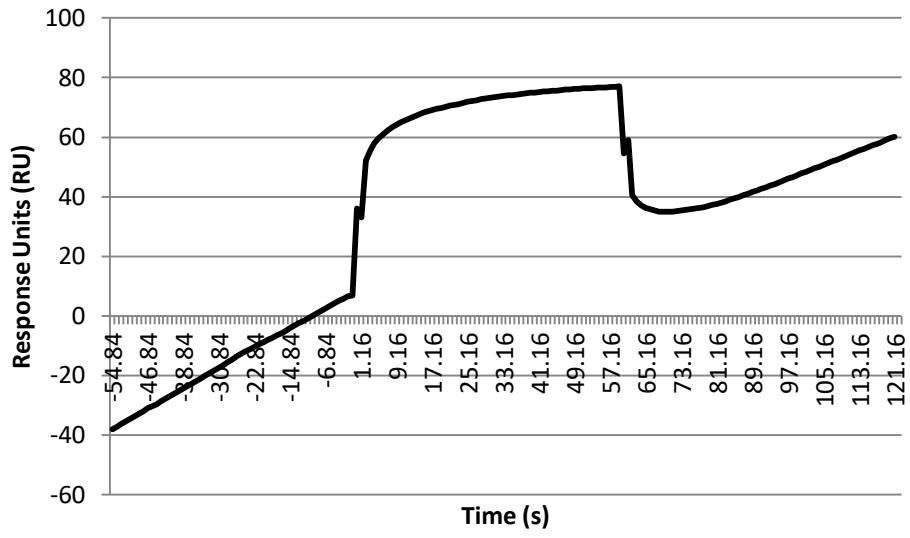

cb)

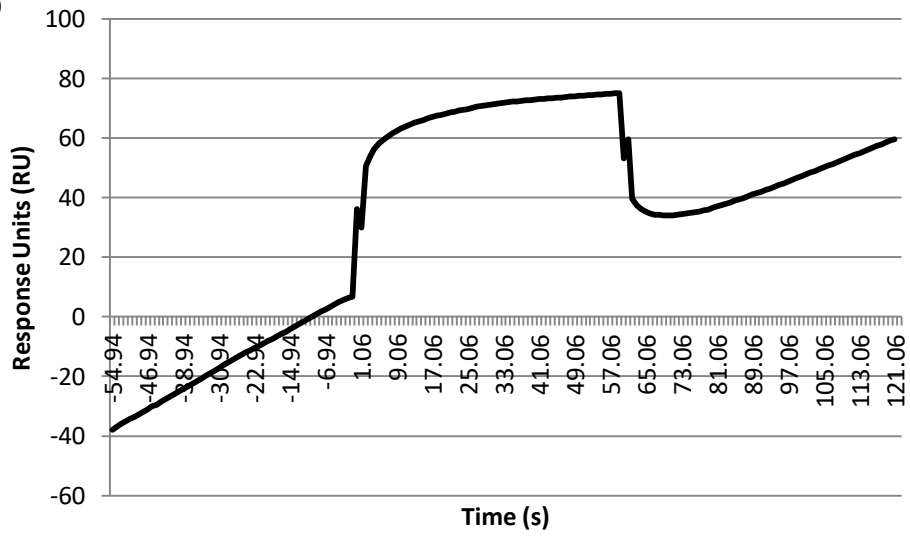

Supplement: mBio.03046-19-sf003.pdf [file mBio.03046-19-sf003.pdf]
