# Supplementary material for: Repurposed Drugs That Block the Gonococcus-Complement Receptor 3 Interaction Can Prevent and Cure Gonococcal Infection of Primary Human Cervical Epithelial Cells
Source: PubMed Central journal article supplement (PMC7064771; doi:10.1128/mbio.03046-19), 2020-03-03

```

GSNLLRPPQQFPEALRECPQQESDIVFLIDGSGSINNIDFQKMKEFVSTVMEQFKKSKTL
GSNLRQQPQKFPEALRGCPQEDSDIAFLIDGSGSIIPHDFRRMKEFVSTVMEQLKSKTL
**** . ** .***** ** .*** ***** ** .***** *****
FSLMQYSDEFRIHFTFNDFKRNPSRSHVSPKQLNGRKTASGIRKVVRELFHKTNGAR
FSLMQYSEEFRIHFTFKEFQNNPFRSLVKPITQLLGRTHATGIRKVVRELFNITNGAR
***** .***** .* ** ** * ** * ** * ** * .***** . *****
ENAAKILVVITDGEKFGDPLDYKDVIPEADRAGVIRYVIGVGNAFNKPQSRRELDTIASK
KNAFKILVVITDGEKFGDPLGYEDVIPEADREGVIRYVIGVDADRSEKSRQELNTIASK
** ***** ** ***** ** ***** ** .*** ** *****
PAGEHVFQVDNFEALNTIQNLQEKIFA Murine I domain
PPRDHVFQVNNFEALKTIQNLREKIFA Human I domain
* .***** ***** ***** .***** 77 % Identity

```

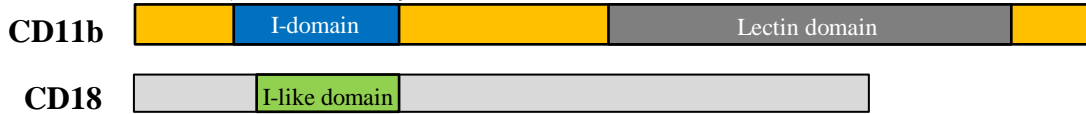

Supplement: mBio.03046-19-sf001.pdf [file mBio.03046-19-sf001.pdf]
