# Supplementary material for: Repurposed Drugs That Block the Gonococcus-Complement Receptor 3 Interaction Can Prevent and Cure Gonococcal Infection of Primary Human Cervical Epithelial Cells
Source: PubMed Central journal article supplement (PMC7064771; doi:10.1128/mbio.03046-19), 2020-03-03
Supplement: mBio.03046-19-sf004.pdf [file mBio.03046-19-sf004.pdf]

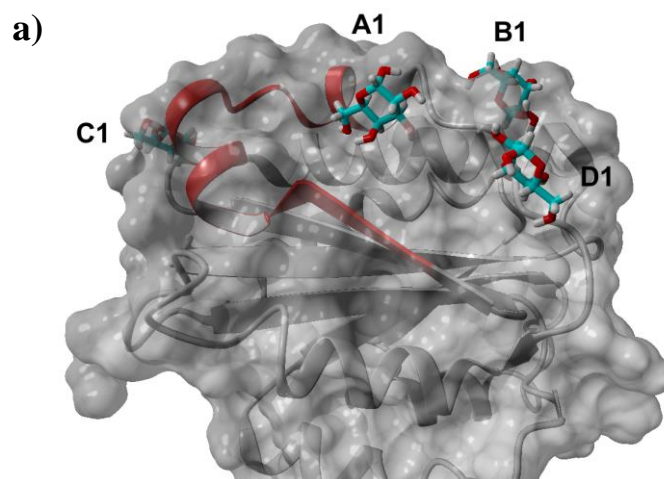

b)

| Cluster   | Bind. energy [kcal/mol] | Contacting receptor residues                                                    | Populated Conformers [%] |
|-----------|-------------------------|---------------------------------------------------------------------------------|--------------------------|
| <b>A1</b> | 3.955                   | ARG 181, HIS 183, PHE 184, LEU 198, PRO 201, ILE 202, THR 203                   | 70.0                     |
| <b>B1</b> | 3.5740                  | PRO 147, PHE 150, ARG 151, LYS 154, LYS 200, PRO 201, ILE 202, THR 203, GLN 204 | 10.0                     |
| <b>C1</b> | 3.6320                  | LYS 165, LYS 166, SER 167, THR 169, LEU 170, PHE 189, GLN 190, PRO 193          | 15.0                     |
| <b>D1</b> | 3.5210                  | GLU 179, ARG 181, THR 203, GLN 204, LEU 205, LEU A 206                          | 5.0                      |
