# Supplementary material for: Repurposed Drugs That Block the Gonococcus-Complement Receptor 3 Interaction Can Prevent and Cure Gonococcal Infection of Primary Human Cervical Epithelial Cells
Source: PubMed Central journal article supplement (PMC7064771; doi:10.1128/mbio.03046-19), 2020-03-03

a)

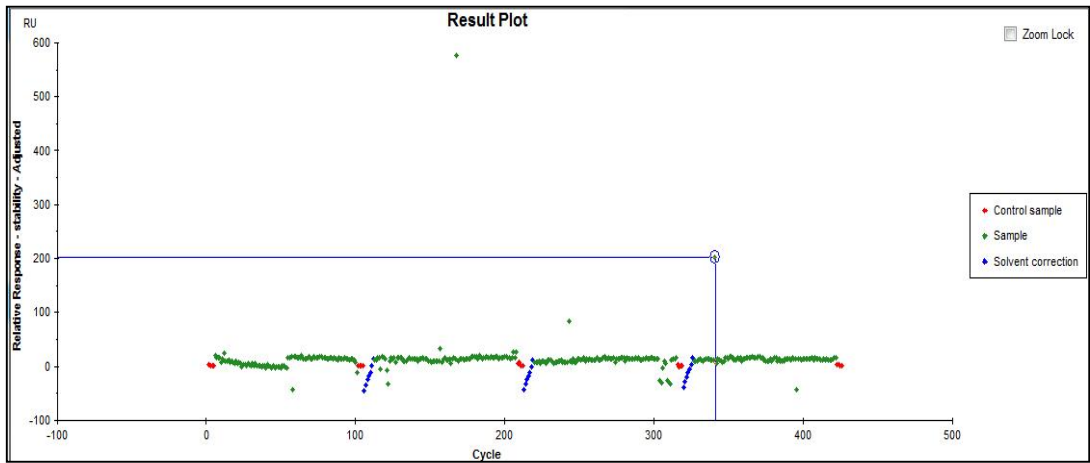

b)

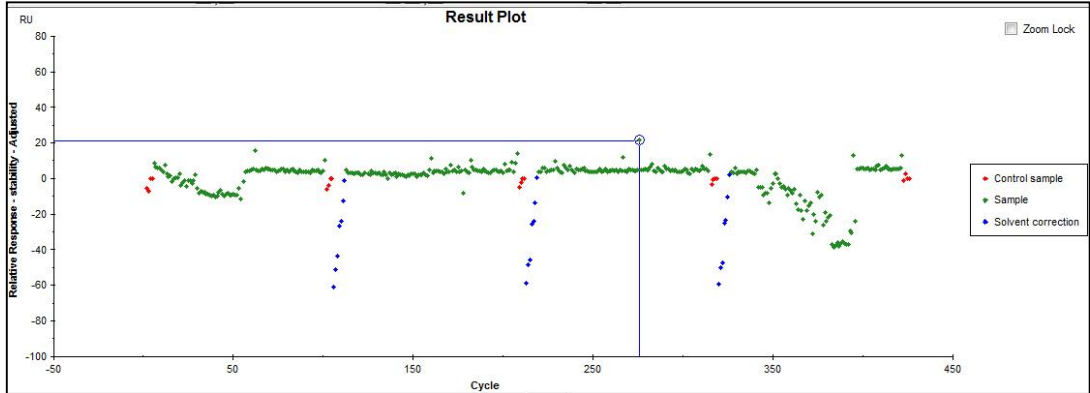

c)

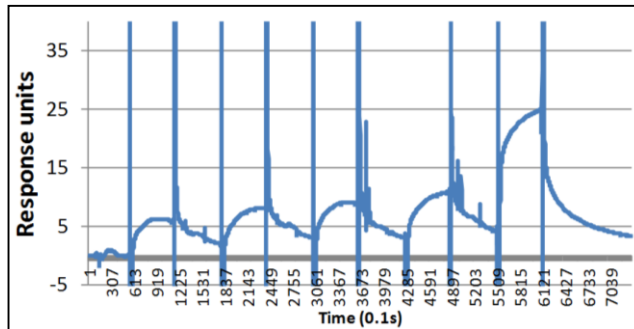

d)

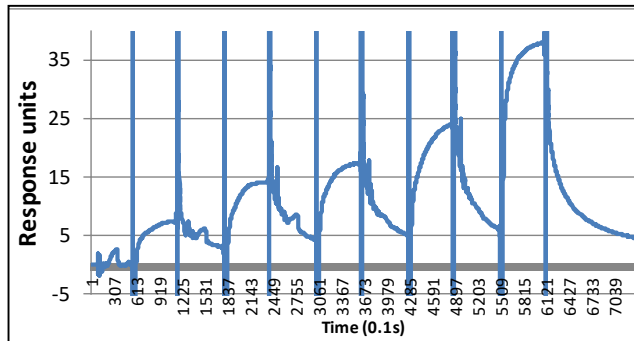

Supplement: mBio.03046-19-sf005.pdf [file mBio.03046-19-sf005.pdf]
